# Supplementary material for: Biosynthetic access to the rare antiarose sugar via an unusual reductase-epimerase
Source: Royal Society of Chemistry journal article supplement (doi:10.1039/c9sc05766h), 2020-01-01
Supplement: c9sc05766h1.pdf [file c9sc05766h1.pdf]

## Electronic Supporting Information

# Biosynthetic Access to the Rare Antiarose Sugar via an Unusual Reductase-Epimerase

Yijun Yan, ‡<sup>a</sup> Jing Yang, ‡<sup>a</sup> Li Wang, ‡<sup>a</sup> Dongdong Xu, <sup>a</sup> Zhiyin Yu, <sup>a</sup> Xiaowei Guo, <sup>a</sup> Geoff P. Horsman, <sup>c</sup> Shuangjun Lin, <sup>b</sup> Meifeng Tao, <sup>b</sup> and Sheng-Xiong Huang\*<sup>a</sup>

<sup>a</sup> State Key Laboratory of Phytochemistry and Plant Resources in West China, and CAS Center for Excellence in Molecular Plant Sciences, Kunming Institute of Botany, Chinese Academy of Sciences, Kunming 650201, China

<sup>b</sup> State Key Laboratory of Microbial Metabolism, School of Life Sciences and Biotechnology, Shanghai Jiao Tong University, 800 Dongchuan Road, Shanghai 200240, China

<sup>c</sup> Department of Chemistry & Biochemistry, Wilfrid Laurier University, Waterloo, ON N2L 3C5, Canada

‡ These authors contributed equally to this work

\*Correspondence and requests for materials should be addressed to S.-X.H. (email: [sxhuang@mail.kib.ac.cn](mailto:sxhuang@mail.kib.ac.cn)).

## Table of Contents

### Experimental procedures

Materials and general experimental procedures

Protein expression and purification

*In vitro* enzymatic assay of RubS3-S5 and RubS3 mutants.

Synthesis of TDP-D-fucose (**2**)

Synthesis of compound TDP-3-keto-D-fucose (**7**)

Deuterium exchange experiments

RubS3 reaction in deuterium water

RubS3 reaction using [4*S*-<sup>2</sup>H]NADPH as cofactor

RubS3 reaction using [4*R*-<sup>2</sup>H]NADPH as cofactor

RubS3 reaction using [4*S*-<sup>2</sup>H]NADPH as cofactor in deuterium water

Kinetic analysis of RubS3 and RbIE

Phylogenetic and sequence analysis

### Tables

**Table S1.** NMR data of compounds **1-3** in D<sub>2</sub>O

**Table S2.** <sup>1</sup>H-NMR data of compounds **2, 4-6** in D<sub>2</sub>O

**Table S3.** NMR data of compound **4** in D<sub>2</sub>O

**Table S4.** Strains, plasmids and primers used and generated in this study

### Figures

**Figure S1.** Proposed pathways for the formation of deoxysugar dTDP-2-keto-D-fucose in rubrolone biosynthesis

**Figure S2.** SDS-PAGE analysis of proteins

**Figure S3.** Enlarged <sup>1</sup>H-NMR spectra of compounds **2** and **4** in D<sub>2</sub>O

**Figure S4.** Enlarged <sup>1</sup>H-<sup>1</sup>H COSY NMR spectrum of compound **4** in D<sub>2</sub>O

**Figure S5.** Key <sup>1</sup>H-<sup>1</sup>H COSY, HMBC and ROESY correlations of compound **4**.

**Figure S6.** HPLC analysis of the products by enzymes

**Figure S7.** Deuterium exchange experiments

**Figure S8.** Phylogenetic analysis of RubS3 and its selected homologues

**Figure S9.** Amino acid sequences alignment

**Figure S10.** *In vitro* enzyme assays of mutants

**Figure S11.** Radical *S*-adenosylmethionine dependent enzyme DesII-catalyzed reactions

**Figure S12.** TDP-deoxysugars directly formed from TDP-4-keto-6-deoxy-D-glucose (**1**) by different reactions

**Figure S13.** HRESIMS analysis of compound **3**

**Figure S14.** HRESIMS analysis of compound **1**

**Figure S15.** HRESIMS analysis of compound **4**

**Figure S16.** HRESIMS analysis of compound **2**

**Figure S17.** HRESIMS analysis of compound **7**

**Figure S18.** HRESIMS analysis of compound **4'** formed with RubS3 in D<sub>2</sub>O

**Figure S19.** HRESIMS analysis of synthesized [4*S*-<sup>2</sup>H] NADPH

**Figure S20.** HRESIMS analysis of **4''** formed with RubS3 use [4*S*-<sup>2</sup>H] NADPH as cofactor

**Figure S21.** HRESIMS analysis of synthesized [4*R*-<sup>2</sup>H] NADPH

**Figure S22.** HRESIMS analysis of compound **4** formed with RubS3 use [4*R*-<sup>2</sup>H] NADPH as cofactor

**Figure S23.** HRESIMS analysis of compound **4'''** formed with RubS3 in D<sub>2</sub>O and use [4*S*-<sup>2</sup>H]NADPH as cofactor

**Figure S24.** <sup>1</sup>H NMR spectrum of compound **3** in D<sub>2</sub>O

**Figure S25.** <sup>1</sup>H NMR spectrum of compound **1** in D<sub>2</sub>O

**Figure S26.** <sup>1</sup>H-<sup>1</sup>H COSY NMR spectrum of compound **1** in D<sub>2</sub>O

**Figure S27.** <sup>1</sup>H NMR spectrum of compound **4** in D<sub>2</sub>O

**Figure S28.** <sup>13</sup>C NMR spectrum of compound **4** in D<sub>2</sub>O

**Figure S29.** <sup>1</sup>H-<sup>1</sup>H COSY NMR spectrum of compound **4** in D<sub>2</sub>O

**Figure S30.** HSQC NMR spectrum of compound **4** in D<sub>2</sub>O

**Figure S31.** HMBC NMR spectrum of compound **4** in D<sub>2</sub>O

**Figure S32.** ROESY NMR spectrum of compound **4** in D<sub>2</sub>O

**Figure S33.** <sup>31</sup>P NMR spectrum of compound **4** in D<sub>2</sub>O

**Figure S34.** <sup>1</sup>H NMR spectrum of compound **2** in D<sub>2</sub>O

**Figure S35.** <sup>1</sup>H NMR spectrum of compound **4'** in D<sub>2</sub>O

**References**

## Experimental procedures

### Materials and general experimental procedures

The reagents, solvents, and restriction enzymes were purchased from standard commercial sources and used directly. The TDP-4-keto-6-deoxy-D-glucose was purchased from Carbosynth China Ltd. DNA isolation and manipulation in *Streptomyces* were performed according to standard protocols.<sup>1</sup> PCR amplifications were carried out on Biometra professional thermocycler (070-851, An Analytik Jena Company) using either Taq DNA polymerase (TaKaRa) or Pfu DNA polymerase (Vazyme). Glucose-6-phosphate dehydrogenase (Coolaber) and active recombinant bacterial alcohol dehydrogenase (Biovision) were purchased from Beijing Lablead Biotechnology Co. Ltd. Primer synthesis and DNA sequencing were performed at TsingKe Company.

HPLC analysis was conducted on a HITACHI Chromaster system equipped with a DAD detector, a Dionex carbopac PA10 carbohydrate column (4 x 250 mm, Thermo), and a flow rate of 1.0 mL/min at a column temperature of 28°C. NMR spectra were recorded in D<sub>2</sub>O using a Bruker Ascend 800 spectrometer (Bruker Corp.), and TMS was used as internal standard. HRESIMS data were obtained using an Agilent G6230 Q-TOF mass instrument (Agilent Corp.).

### Protein expression and purification

The genes encoding RubS3, RubS4 and RubS5 were amplified by PCR from genomic DNA of *Streptomyces* sp. KIB-H033 with primers listed in Table S3. The genes encoding dTDP-4-keto-6-deoxy-D-glucose reductase Fcd, dTDP-4-keto-6-deoxy-D-glucose 3,4-ketoisomerase FdtA, RblE, three homologs (SFQ20469, WP009948706, and WP094006909) and nine RubS3 mutants (H102V, T111V, Y113F, Y135F, K139A, R144L, W160T, S163A and E177G) were synthesized by GENEWIZ company. The genes were cloned into the pET-26b vector using the NdeI and XhoI (HindIII) restriction sites. The resulting constructs were used to transform *Escherichia coli* BL21(DE3) cells, and cultivated in 500 mL LB media containing kanamycin (50 µg/mL) for 4 h at 37 °C until the OD<sub>600</sub> reached 0.6. The cultures were cooled to 16 °C and induced with 0.25 mM isopropyl-β-D-thiogalactopyranoside (IPTG) for 18 h at 16 °C. The cells were centrifuged for 10 min at 4,000 rpm at 4 °C and the pellet resuspended in 50 mL of lysis buffer (50 mM Tris, 300 mM NaCl, 15 mM imidazole, 10% glycerol, pH 8.0) and lysed on ice by sonication. The cell lysates were centrifugated at 24,000 rpm for 30 min and the supernatant was filtered and purified using the AKTA pure system with a 5 mL Histrap™ FF column (GE Healthcare). The target proteins were desalted using a PD-10

desalting column (GE Healthcare) and concentrated by ultrafiltration using Amicon Ultra-4 (10 K, Millipore) and stored at -80 °C in buffer (100 mM NaH<sub>2</sub>PO<sub>4</sub>, 10% glycerol, pH 7.2). Protein concentrations were determined using the Bradford method. SDS-PAGE analysis of proteins are shown in Fig S2.

### ***In vitro* enzymatic assay of RubS3-S5 and RubS3 mutants.**

The RubS5-catalyzed reaction was carried out in a 200 µL reaction mixture containing 50 mM Tris/HCl (pH 7.5), 1.25 mM D-glucose-1-phosphate, 2 mM dTTP, 10 µM RubS5. The RubS4-catalyzed reaction mixture (200µL) contained 50 mM Tris/HCl (pH 7.5), 10 mM MgCl<sub>2</sub>, 1.25 mM D-glucose-1-phosphate, 2 mM dTTP, 2 mM NADPH, 10 µM RubS5 and 10 µM RubS4. The RubS3 and mutants reactions were performed in 200 µL system including 50 mM Tris/HCl (pH 7.5), 1 mM TDP-4-keto-6-deoxy-D-glucose (**1**), 2 mM NADPH, and 10 µM RubS3 or mutants. After incubation at 30 °C for 2 h, the reactions were quenched by adding 50 µL chloroform. The reaction mixtures were then centrifuged at 12,000 rpm for 5 min and the supernatants were analyzed by analytical HPLC. The HPLC analysis was performed at a flow rate of 1 mL/min with UV detection at 278 nm using a 28 min solvent gradient as follows: 5% B (0-5 min); 20% B (5-10 min); 40% B (10-15 min); 60% B (15-20 min); 80% B (20-22 min); 100% B (22-25 min); 5% B (25-28 min). {A: H<sub>2</sub>O; B: acetic acid – ammonium acetate buffer (700 mM, pH 5.2)}.

The RubS3-, RubS4- and RubS5-catalyzed reactions were each scaled up to a 6 mL volume. After incubation at 30 °C for 2 h, the enzymatic reactions were quenched by chloroform and centrifuged, and the supernatant was evaporated and the compounds were isolated by analytical HPLC using a Dionex carbopac PA10 carbohydrate column. The structures of **1**, **3** and **4** were determined by analyses of HRESIMS data (Figs. S13-S15) and NMR spectra (Figs. S24-S33).

Compound **1** (0.9 mg), produced by RubS4, white powder; <sup>1</sup>H-NMR data see Table S1; HRESIMS *m/z* 545.0588 [M-H]<sup>-</sup> for C<sub>16</sub>H<sub>24</sub>N<sub>2</sub>O<sub>15</sub>P<sub>2</sub> (calcd. 545.0579).

Compound **3** (1.0 mg), produced by RubS5, white powder; <sup>1</sup>H-NMR data see Table S1; HRESIMS *m/z* 563.0682 [M-H]<sup>-</sup> for C<sub>16</sub>H<sub>26</sub>N<sub>2</sub>O<sub>16</sub>P<sub>2</sub> (calcd. 563.0685).

Compound **4** (1.2 mg), produced by RubS3, white powder; 1D and 2D NMR data see Table S3; HRESIMS *m/z* 547.0723 [M-H]<sup>-</sup> for C<sub>16</sub>H<sub>26</sub>N<sub>2</sub>O<sub>15</sub>P<sub>2</sub> (calcd. 547.0736).

### **Synthesis of TDP-D-fucose (**2**)**

The TDP-D-fucose (**2**) was synthesized by TDP-4-keto-6-deoxy-D-glucose reductase Fcd, and the reaction was carried out in a 6 mL reaction mixture containing 50 mM Tris/HCl (pH

7.5), 1 mM TDP-4-keto-6-deoxy-D-glucose (**1**), 2 mM NADPH, and 10  $\mu$ M Fcd. The isolation was performed as above for RubS3-catalyzed reactions. The structure of **2** was determined by analyses of HRESIMS data (Fig S16) and  $^1\text{H-NMR}$  spectrum (Fig. S34).

Compound **2** (0.8 mg) produced by Fcd;  $^1\text{H-NMR}$  data see Table S1; HRESIMS  $m/z$  547.0754  $[\text{M-H}]^-$  for  $\text{C}_{16}\text{H}_{26}\text{N}_2\text{O}_{15}\text{P}_2$  (calcd. 547.0736).

### Synthesis of compound TDP-3-keto-D-fucose (**7**)

The TDP-3-keto-D-fucose (**7**) was obtained from the FdtA-catalyzed reaction using **1** as the substrate in a 1 mL mixture. Compound **7** was purified using the method mentioned above for compound **3**. The structure of **7** was determined by analysing HRESIMS data (Fig. S17).

Compound **7** (0.15 mg) produced by FdtA; HRESIMS  $m/z$  545.0587  $[\text{M-H}]^-$  for  $\text{C}_{16}\text{H}_{24}\text{N}_2\text{O}_{15}\text{P}_2$  (calcd. 545.0579).

### Deuterium exchange experiments.

**RubS3 reaction in deuterium water:** The reaction mixture of RubS3 contained 750  $\mu\text{L}$  0.4 M Tris/HCl (pH 7.5, final 50 mM), 150  $\mu\text{L}$  40 mM TDP-4-keto-6-deoxy-D-glucose (**1**) (final 1 mM), 300  $\mu\text{L}$  40 mM NADPH (final 2mM), 60  $\mu\text{L}$  1 mM RubS3 (final 10  $\mu\text{M}$ ), and 4740  $\mu\text{L}$  deuterium water. After incubation at 30  $^\circ\text{C}$  for 2 h, the enzymatic reaction was quenched by chloroform and centrifuged, the supernatant was evaporated and the compound was isolated by analytical HPLC using a Dionex carbopac PA10 carbohydrate column. The structure of **4'** was determined by analysing  $^1\text{H-NMR}$  (Fig. S35) and HRESIMS data (Fig. S18).

Compound **4'** (1.1 mg), white powder;  $^1\text{H-NMR}$  data see Fig. S35; HRESIMS  $m/z$  548.0816  $[\text{M-H}]^-$  for  $\text{C}_{16}\text{H}_{25}\text{DN}_2\text{O}_{15}\text{P}_2$  (calcd. 548.0798).

**RubS3 reaction using [4S- $^2\text{H}$ ] NADPH as cofactor:** [4S- $^2\text{H}$ ] NADPH was synthesized using the method reported by Barber.<sup>2</sup> The reaction (200  $\mu\text{L}$ ) contain 83 mM phosphate buffer (pH 8.0), 9.3 mM  $\text{NADP}^+$ , 14.7 mM D-glucose-1- $^2\text{H}$ , 40% DMSO and 5 units of glucose-6-phosphate dehydrogenase. After incubation at 30  $^\circ\text{C}$  for 1 h, 5  $\mu\text{L}$  reaction solution was used for HRESIMS analysis (Fig. S19, HRESIMS  $m/z$  745.0924  $[\text{M-H}]^-$  for  $\text{C}_{21}\text{H}_{29}\text{DN}_7\text{O}_{17}\text{P}_3$ , calcd for 745.0901). Then, other 20  $\mu\text{L}$  reaction solution was added to the RubS3 reaction system including 50 mM Tris/HCl (pH 7.5), 1 mM TDP-4-keto-6-deoxy-D-glucose (**1**), and 10  $\mu\text{M}$  RubS3. The enzymatic reaction was quenched by chloroform and centrifuged, the supernatant was isolated by analytical HPLC using a Dionex carbopac PA10 carbohydrate column. The structure of **4''** was determined by analysing HRESIMS data (Fig. S20).

Compound **4''**, HRESIMS  $m/z$  548.0796  $[\text{M-H}]^-$  for  $\text{C}_{16}\text{H}_{25}\text{DN}_2\text{O}_{15}\text{P}_2$  (calcd. 548.0798).

**RubS3 reaction using [4R- $^2\text{H}$ ]NADPH as cofactor:** [4R- $^2\text{H}$ ] NADPH was synthesized by the

method of Barber.<sup>2</sup> The reaction (200  $\mu$ L) contained 25 mM Tris buffer (pH 9.0), 2.8 mM NADP<sup>+</sup>, 1 M 2-propanol-<sup>2</sup>H<sub>8</sub>, and 5 units of alcohol dehydrogenase. After incubation at 30 °C for 1 h, 5  $\mu$ L reaction solution was used for HRESIMS analysis (Fig. S21, HRESIMS  $m/z$  372.0436 [M-2H]<sup>2-</sup> for C<sub>21</sub>H<sub>29</sub>DN<sub>7</sub>O<sub>17</sub>P<sub>3</sub>, calcd for 372.0414) and other 20  $\mu$ L reaction solution was added to the RubS3 reaction system containing 50 mM Tris/HCl (pH 7.5), 1 mM TDP-4-keto-6-deoxy-D-glucose, and 10  $\mu$ M RubS3. This reaction was quenched by chloroform and centrifuged, the supernatant was isolated by analytical HPLC using a Dionex carbopac PA10 carbohydrate column. The structure of **4** was determined by analysing HRESIMS data (Fig. S22).

Compound **4**, HRESIMS  $m/z$  547.0700 [M-H]<sup>-</sup> for C<sub>16</sub>H<sub>26</sub>N<sub>2</sub>O<sub>15</sub>P<sub>2</sub> (calcd. 547.0736).

**RubS3 reaction using [4S-<sup>2</sup>H]NADPH as cofactor in deuterium water:** The 200  $\mu$ L reaction mixture of RubS3 was prepared by adding 20  $\mu$ L glucose-6-phosphate dehydrogenase reaction solution, 25  $\mu$ L 0.4 M Tris/HCl (pH 7.5), 5  $\mu$ L 40 mM TDP-4-keto-6-deoxy-D-glucose (**1**), 2  $\mu$ L 1 mM RubS3, and 148  $\mu$ L deuterium water. After incubation at 30 °C for 2 h, the enzymatic reaction was quenched by chloroform and centrifuged, the supernatant was isolated by analytical HPLC using a Dionex carbopac PA10 carbohydrate column. The structure of **4'''** was determined by analysing HRESIMS data (Fig. S23).

Compound **4'''**, 549.0866 [M-H]<sup>-</sup> for C<sub>16</sub>H<sub>24</sub>D<sub>2</sub>N<sub>2</sub>O<sub>15</sub>P<sub>2</sub> (calcd. 549.0861).

### Kinetic analysis of RubS3 and RblE

The RubS3 or RblE concentration was 0.005 mg/mL (0.16  $\mu$ M) in the reaction mixture contained 50 mM Tris/HCl (pH 7.5), 0.5 mM NADPH and TDP-4-keto-6-deoxy-D-glucose (**1**) concentrations ranging between 20  $\mu$ M and 200  $\mu$ M. The kinetics was measured by the decrease in absorbance at 340 nm using an extinction coefficient of 6220 M<sup>-1</sup>cm<sup>-1</sup> for NADPH. Recordings were carried out with a NanoDrop instrument (Fisher Scientific). All assays were performed in triplicate, the  $K_M$  and  $V_{max}$  values were calculated from curve fitting to the Michaelis-Menten equation  $v_0 = (V_{max} \times [S]) / (K_M + [S])$ . The  $k_{cat}$  values were calculated according to the equation  $k_{cat} = V_{max} / [E]$ .

### Phylogenetic and sequence analysis

The sequence data was analyzed by the neighbor-joining method using the NEIGHBOR program Phylogeny Inference Package (PHYLIP).<sup>3</sup> Bootstrapping and decay analysis were performed by NJ plot. Parsimony analysis and various clades were determined by MEGA.<sup>4</sup> The sequence alignment was created using Clustal Omega<sup>5</sup> and the figure was produced using EsPrpt 3.0.<sup>6</sup>

**Table S1.** NMR data of compounds **1-3** in D<sub>2</sub>O. ( $\delta$  in ppm, *J* in Hz).

| No. | <b>1</b>               | <b>2</b>               | <b>3</b>               |
|-----|------------------------|------------------------|------------------------|
|     | $\delta_{\text{H}}$    | $\delta_{\text{H}}$    | $\delta_{\text{H}}$    |
| 1   | 5.55 (dd, 6.8, 3.6)    | 5.54 (m)               | 5.54 (d, 2.3)          |
| 2   | 3.62 (d, 9.8)          | 3.73 (dt, 10.4, 3.2)   | 3.47 (d, 9.6)          |
| 3   | 3.78 (d, 9.8)          | 3.89 (dd, 10.4, 3.0)   | 3.40 (t, 9.6)          |
| 4   |                        | 3.80 (br s)            | 3.72 (d, 10.1)         |
| 5   | 4.10 (q, 6.5)          | 4.25 (br q, 6.5)       | 3.84 (d, 10.1)         |
| 6   | 1.22 (d, 6.5)          | 1.19 (d, 6.5)          | 3.71 (d, 12.8)         |
|     |                        |                        | 3.80 (d, 12.8)         |
| 7   | 6.35 (t, 6.8)          | 6.32 (t, 6.9)          | 6.29 (t, 6.9)          |
| 8   | 2.35 (m)               | 2.36 (m)               | 2.32 (m)               |
| 9   | 4.63 (m)               | 4.59 (m)               | 4.56 (m)               |
| 10  | 4.18-4.19 (overlapped) | 4.14-4.16 (overlapped) | 4.12-4.13 (overlapped) |
| 11  | 4.18-4.19 (overlapped) | 4.14-4.16 (overlapped) | 4.12-4.13 (overlapped) |
| 12  | 7.75 (s)               | 7.71 (s)               | 7.68 (s)               |
| 13  | 1.93 (s)               | 1.90 (s)               | 1.87 (s)               |

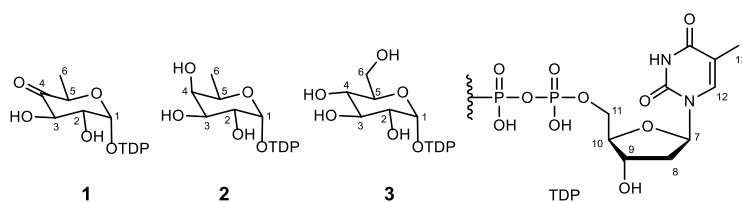**Table S2.** NMR data of compound **4** in this study and the NMR data of compounds **2**, **5**, and **6** reported in the literatures<sup>a</sup>

| No. | TDP-D-<br>antiarose ( <b>4</b> ) | TDP-D-fucose<br>( <b>2</b> ) <sup>7</sup> | TDP-D-allose<br>( <b>5</b> ) <sup>8</sup>                             | TDP-D-quinovose<br>( <b>6</b> ) <sup>7</sup> |
|-----|----------------------------------|-------------------------------------------|-----------------------------------------------------------------------|----------------------------------------------|
|     | $\delta_{\text{H}}$              | $\delta_{\text{H}}$                       | $\delta_{\text{H}}$                                                   | $\delta_{\text{H}}$                          |
| 1   | 5.54 (dd, 6.9, 3.8)              | 5.56 (dd, 6.8, 3.6)                       | 5.38 (dd) <i>J</i> <sub>p</sub> 7.15;<br><i>J</i> <sub>1,2</sub> 3.75 | 5.53 (dd, 7.0, 3.6)                          |
| 2   | 3.90 (br s)                      | 3.74 (dt, 10.5, 3.2)                      | 3.65 (dd) <i>J</i> <sub>2,3</sub> 3.6                                 | 3.52 (dt, 9.5, 3.6)                          |
| 3   | 3.96 (t, 3.8)                    | 3.91 (dd, 10.5, 3.2)                      | 3.95 (m) <i>J</i> <sub>3,4</sub> 3.2                                  | 3.71 (t, 9.5)                                |
| 4   | 3.74 (d, 3.8)                    | 3.81 (br d, 3.2)                          | 3.25 (dd) <i>J</i> <sub>4,5</sub> 10.1                                | 3.15 (t, 9.5)                                |
| 5   | 4.45 (q, 6.6)                    | 4.28 (br q, 6.6)                          | 4.02 (m) <i>J</i> <sub>5,6</sub> 6.3                                  | 3.97 (dq, 9.5, 6.2)                          |
| 6   | 1.21 (d, 6.6)                    | 1.21 (d, 6.6)                             | 1.13 (d)                                                              | 1.27 (d, 6.2)                                |
| 7   | 6.34 (t, 7.0)                    | 6.34 (t, 7.0)                             | 6.24 (t)                                                              | 6.34 (t, 6.9)                                |
| 8   | 2.37 (m)                         | 2.36 (m)                                  | 2.24 (m)                                                              | 2.36 (m)                                     |
| 9   | 4.62 (m)                         | 4.62 (m)                                  | 4.48 (m)                                                              | 4.62 (m)                                     |
| 10  | 4.17-4.19 <sup>b</sup>           | 4.17 (m)                                  | 4.06 (m)                                                              | 4.17 (m)                                     |
| 11  | 4.17-4.19 <sup>b</sup>           | 4.17 (m)                                  | 4.04 (dd)                                                             | 4.17 (m)                                     |
| 12  | 7.74 (s)                         | 7.74 (s)                                  | 7.59 (s)                                                              | 7.74 (s)                                     |
| 13  | 1.93 (s)                         | 1.93 (s)                                  | 1.78 (s)                                                              | 1.93 (s)                                     |

<sup>a</sup> Measured in D<sub>2</sub>O,  $\delta$  in ppm, *J* in Hz. <sup>b</sup> Overlapped signals.

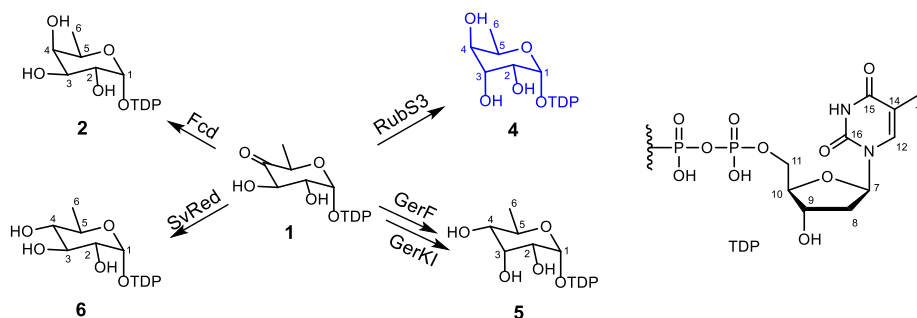



**Table S3.** NMR data of compound **4** in D<sub>2</sub>O. ( $\delta$  in ppm, *J* in Hz).

| No. | TDP-D-antiarose( <b>4</b> ) |                        |                                     |               |          |
|-----|-----------------------------|------------------------|-------------------------------------|---------------|----------|
|     | $\delta_C$                  | $\delta_H$             | <sup>1</sup> H- <sup>1</sup> H COSY | HMBC          | ROESY    |
| 1   | 95.39                       | 5.54 (dd, 6.9, 3.8)    | 2                                   | 3, 5          | 2        |
| 2   | 64.56                       | 3.90 (br s)            | 1, 3                                |               | 1, 3     |
| 3   | 70.35                       | 3.96 (t, 3.8)          | 2, 4                                |               | 4        |
| 4   | 71.48                       | 3.74 (d, 3.8)          | 3                                   | 2, 3          | 3, 5, 6  |
| 5   | 63.29                       | 4.45 (q, 6.6)          | 6                                   | 1, 4, 6       | 4, 6     |
| 6   | 14.82                       | 1.21 (d, 6.6)          | 5                                   | 4, 5          | 4, 5     |
| 7   | 84.95                       | 6.34 (t, 7.0)          | 8                                   | 12, 16        | 8, 10    |
| 8   | 38.51                       | 2.37 (m)               | 7, 9                                | 7, 9          | 7, 9, 12 |
| 9   | 70.92                       | 4.62 (m)               | 8, 10                               | 7             |          |
| 10  | 65.43                       | 4.17-4.19 <sup>a</sup> | 9                                   | 11            |          |
| 11  | 85.31                       | 4.17-4.19 <sup>a</sup> |                                     | 9             |          |
| 12  | 137.35                      | 7.74 (s)               |                                     | 7, 13, 15, 16 | 8, 13    |
| 13  | 11.62                       | 1.93 (s)               |                                     | 12, 14, 15    | 12       |
| 14  | 111.75                      |                        |                                     |               |          |
| 15  | 166.58                      |                        |                                     |               |          |
| 16  | 151.73                      |                        |                                     |               |          |

<sup>a</sup>Overlapped signals.

**Table S4.** Strains, plasmids and primers used and generated in this study

| Strains/Plasmid                  | Purpose                                                                                           | Sources    |
|----------------------------------|---------------------------------------------------------------------------------------------------|------------|
| <b>Strains</b>                   |                                                                                                   |            |
| <i>E. coli</i>                   |                                                                                                   |            |
| DH10B                            | Host strain for cloning                                                                           | Invitrogen |
| BL21(DE3)                        | Heterologous host for protein expression                                                          | NEB        |
| <i>Streptomyces</i>              |                                                                                                   |            |
| <i>Streptomyces</i> sp. KIB-H033 | Rubrolones wild type producing strain                                                             | This study |
| <b>Plasmids</b>                  |                                                                                                   |            |
| pET26b(+)                        | Kan <sup>r</sup> , Protein expression vector used in <i>E.coli</i> , encoding C-terminal His-tag, | Novagen    |
| pET26b-rubS5                     | pET26b(+) derived plasmid for expression C-terminal His-tag RubS5                                 | This study |
| pET26b-rubS4                     | pET26b(+) derived plasmid for expression C-terminal His-tag RubS4                                 | This study |
| pET26b-rubS3                     | pET26b(+) derived plasmid for expression C-terminal His-tag RubS3                                 | This study |
| pET26b-rblE                      | pET26b(+) derived plasmid for expression C-terminal His-tag RblE                                  | This study |
| pET26b-fcd                       | pET26b(+) derived plasmid for expression C-terminal His-tag Fcd                                   | This study |
| pET26b-fdtA                      | pET26b(+) derived plasmid for expression C-terminal His-tag FdtA                                  | This study |
| pET26b-sfq20469                  | pET26b(+) derived plasmid for expression C-terminal His-tag SFQ20469                              | This study |
| pET26b-w8706                     | pET26b(+) derived plasmid for expression C-terminal His-tag WP009948706                           | This study |
| pET26b-w6909                     | pET26b(+) derived plasmid for expression C-terminal His-tag wp094006909                           | This study |
| <b>Primers</b>                   |                                                                                                   |            |
| RubS5-pET26b-S                   | 5'- GGAATTCCATATGAAAGGGATCATCCTCG-3'                                                              | This study |
| RubS5-pET26b-A                   | 5'- CCGCTCGAGGCCGGCCTGCGCCGC -3'                                                                  | This study |
| RubS4-pET26b-S                   | 5'- GGAATTCCATATGTCGCGACAGCTGCGGATCCTG-3'                                                         | This study |
| RubS4-pET26b-A                   | 5'- CCGCTCGAGTGCCCCCGGGCCGGGGCG -3'                                                               | This study |
| RubS3-pET26b-S                   | 5'- GGAATTCCATATGATGAGGAAGGCGATCTG-3'                                                             | This study |
| RubS3-pET26b-A                   | 5'- CCGCTCGAGGGCCCGCTGGACGGC-3'                                                                   | This study |

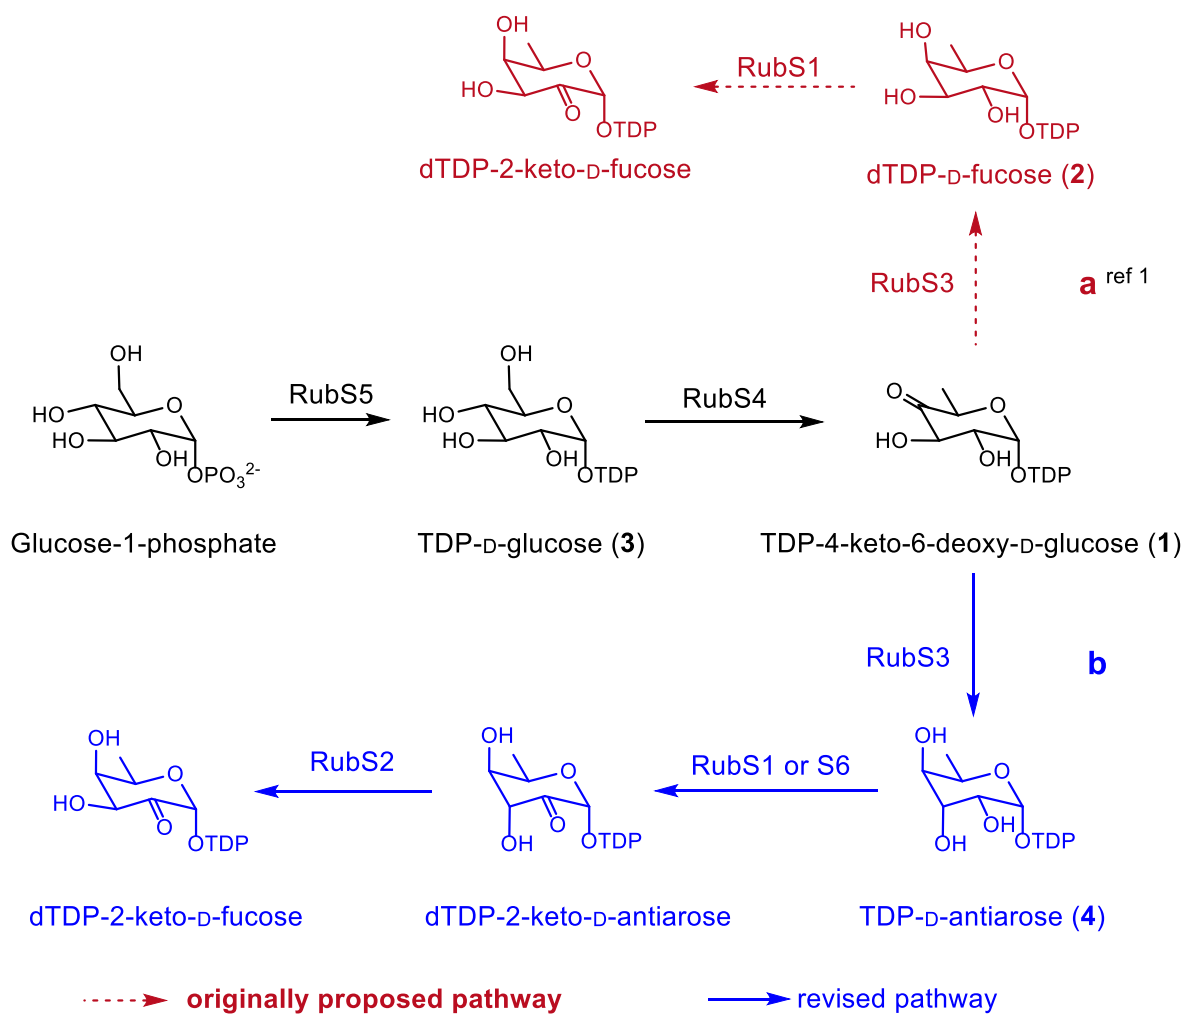

**Figure S1.** Proposed pathways for the formation of deoxysugar dTDP-2-keto-D-fucose in rubrolone biosynthesis. **a** originally proposed. **b** revised in this study.

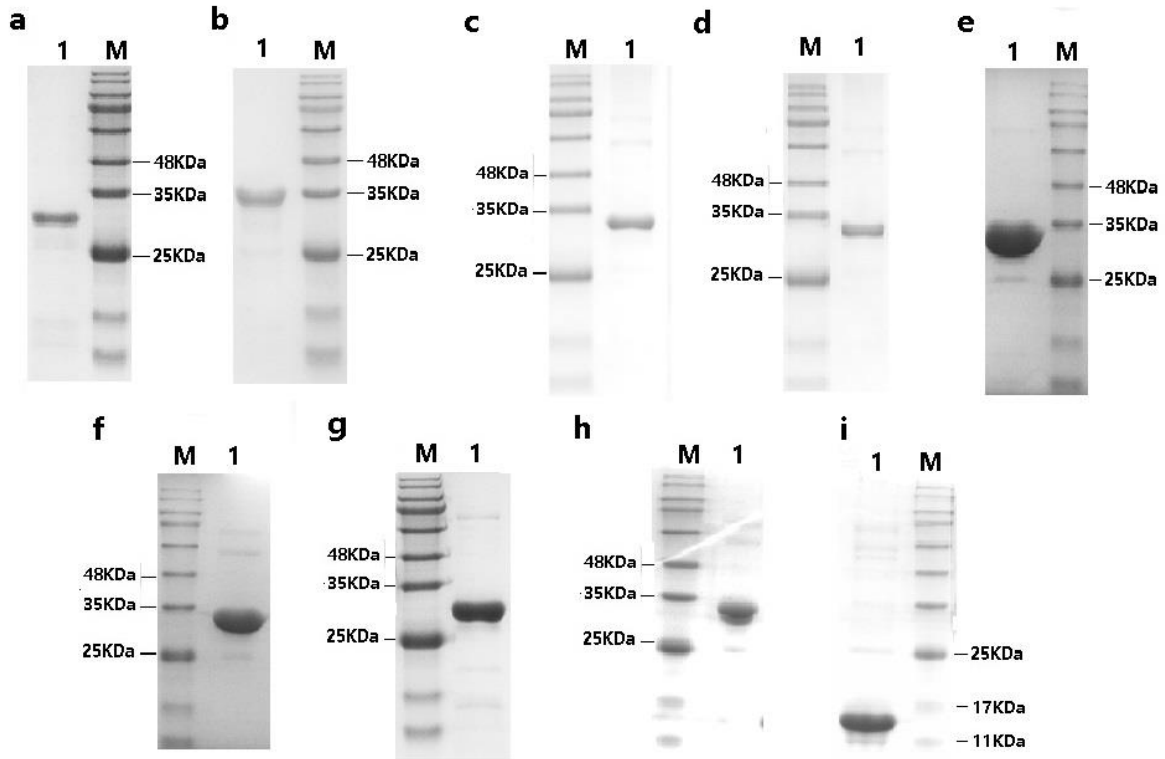

**Figure S2.** SDS-PAGE analysis of proteins. **a.** Lane 1, RubS5 (calculated molecular weight 31.5 KDa); **b.** Lane 1, RubS4 (calculated molecular weight 37.4 KDa); **c.** Lane 1, RubS3 (calculated molecular weight 32.9 KDa). **d.** Lane 1, RbIE (calculated molecular weight 32.9 KDa). **e.** Lane 1, SFQ20469 (calculated molecular weight 32.6 KDa). **f.** Lane 1, WP009948706 (calculated molecular weight 32.5 KDa). **g.** Lane 1, WP094006909 (calculated molecular weight 31.5 KDa). **h.** Lane 1, Fcd (calculated molecular weight 35.5 KDa). **i.** Lane 1, FdtA (calculated molecular weight 16.0 KDa).

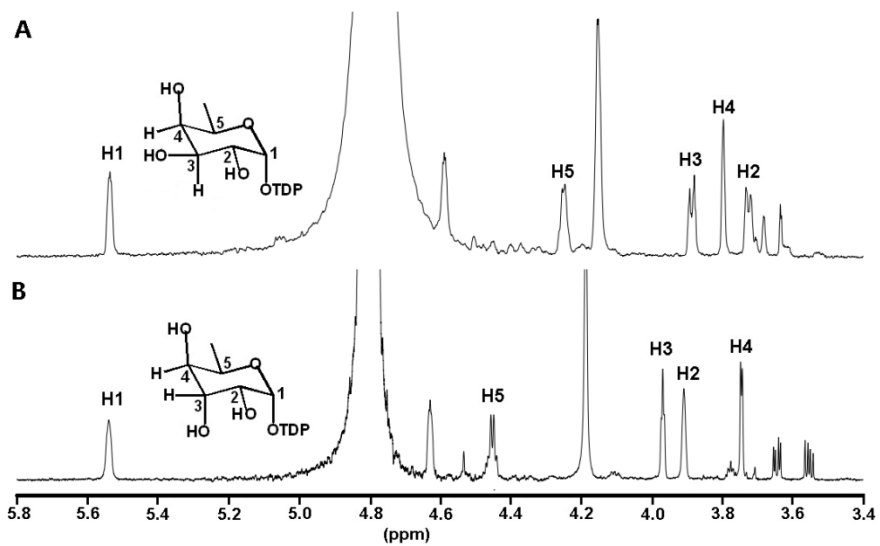

**Figure S3.** Enlarged  $^1\text{H-NMR}$  spectra of compounds **2** and **4** in  $\text{D}_2\text{O}$ . **A**  $^1\text{H-NMR}$  of TDP-D-Fucose (**2**). **B**  $^1\text{H-NMR}$  of TDP-D-antiarose (**4**).

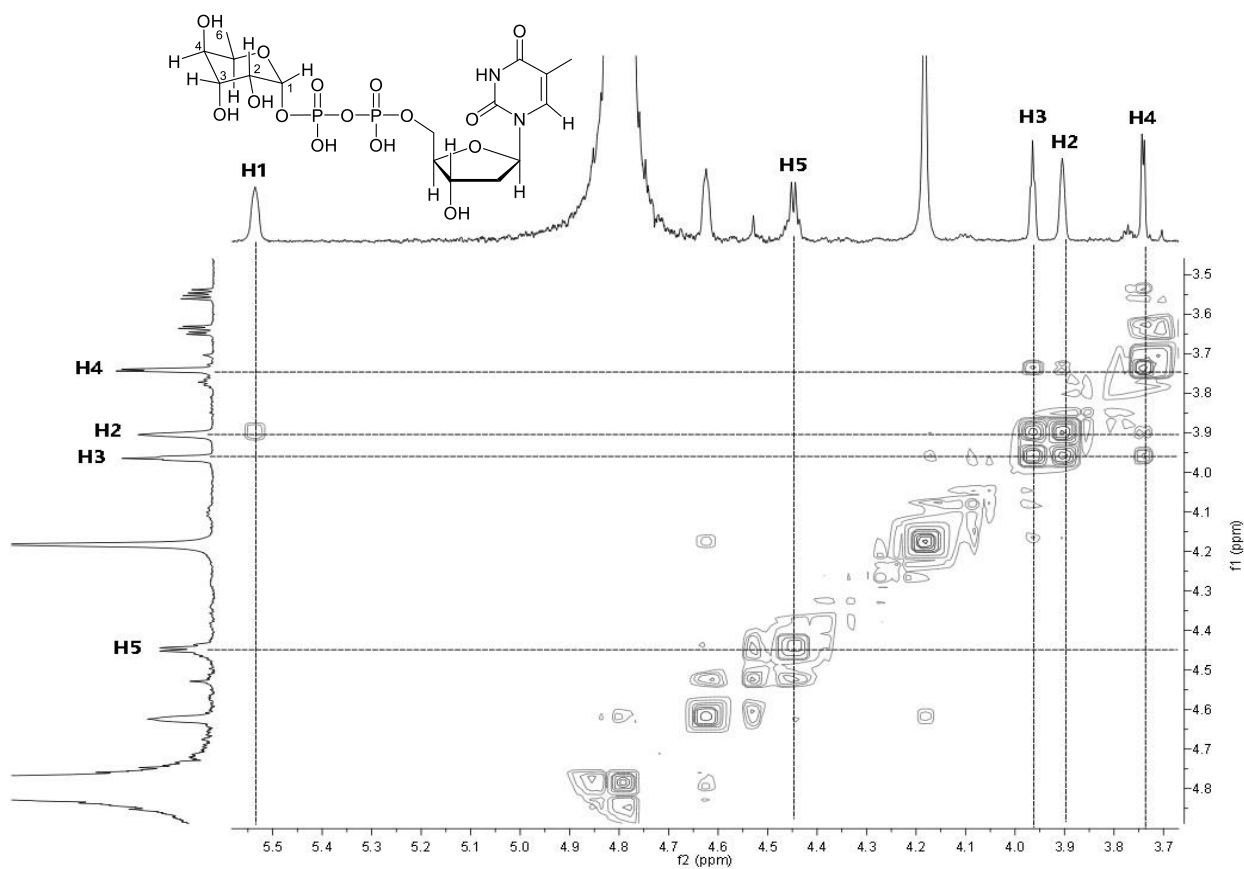

**Figure S4.** Enlarged  $^1\text{H-}^1\text{H}$  COSY NMR spectrum of compound **4** in  $\text{D}_2\text{O}$ .

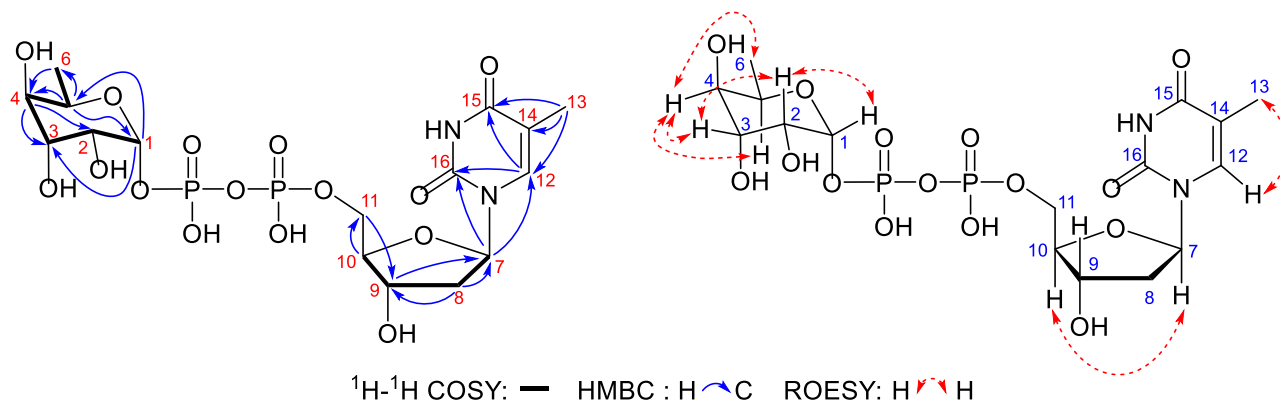

**Figure S5.** Key  $^1\text{H}$ - $^1\text{H}$  COSY, HMBC and ROESY correlations for compound **4**.

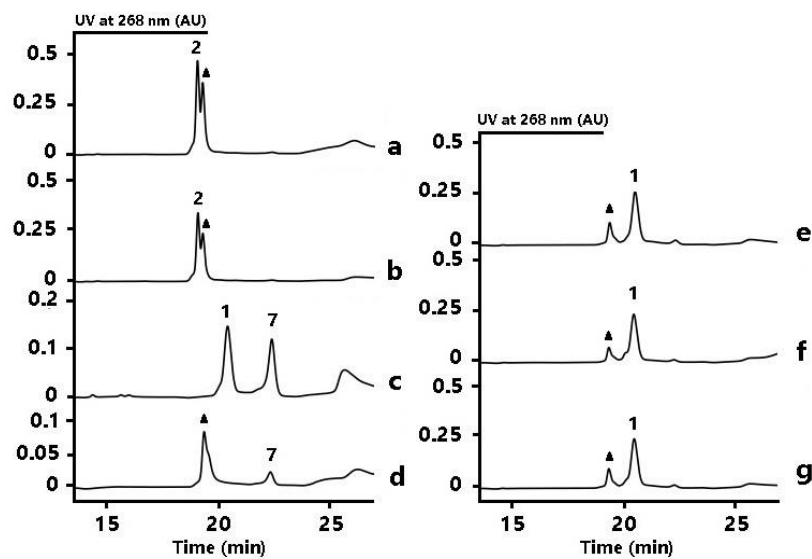

**Figure S6.** HPLC analysis of the products by enzymes. **a** Fcd reaction. **b** RubS3 reaction with substrate **2**. **c** FdtA reaction. **d** RubS3 reaction with substrate **7**. RubS3 homologues reaction: **e** SFQ20469. **f** WP009948706. **g** WP094006909. Triangle = NADP<sup>+</sup>.

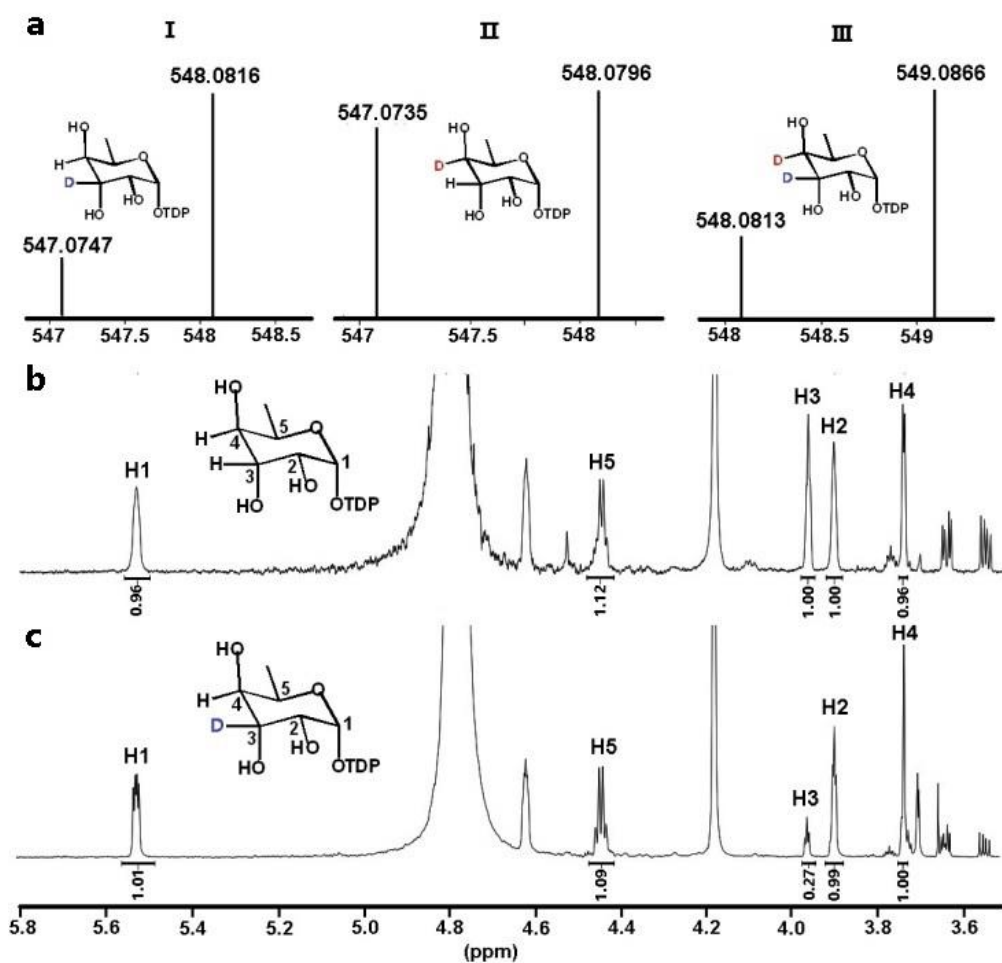

**Figure S7.** Deuterium exchange experiments. **a** HRESIMS analysis. I, TDP-D-antiarose formed with RubS3 in  $D_2O$ ; II, TDP-D-antiarose formed with RubS3 and  $[4S-^2H]NADPH$  as cofactor; III, TDP-D-antiarose formed with RubS3 in  $D_2O$  and  $[4S-^2H]NADPH$  as cofactor. **b**  $^1H$ -NMR of TDP-D-antiarose formed with RubS3 in  $H_2O$ . **c**  $^1H$ -NMR of TDP-D-antiarose formed with RubS3 in  $D_2O$ .

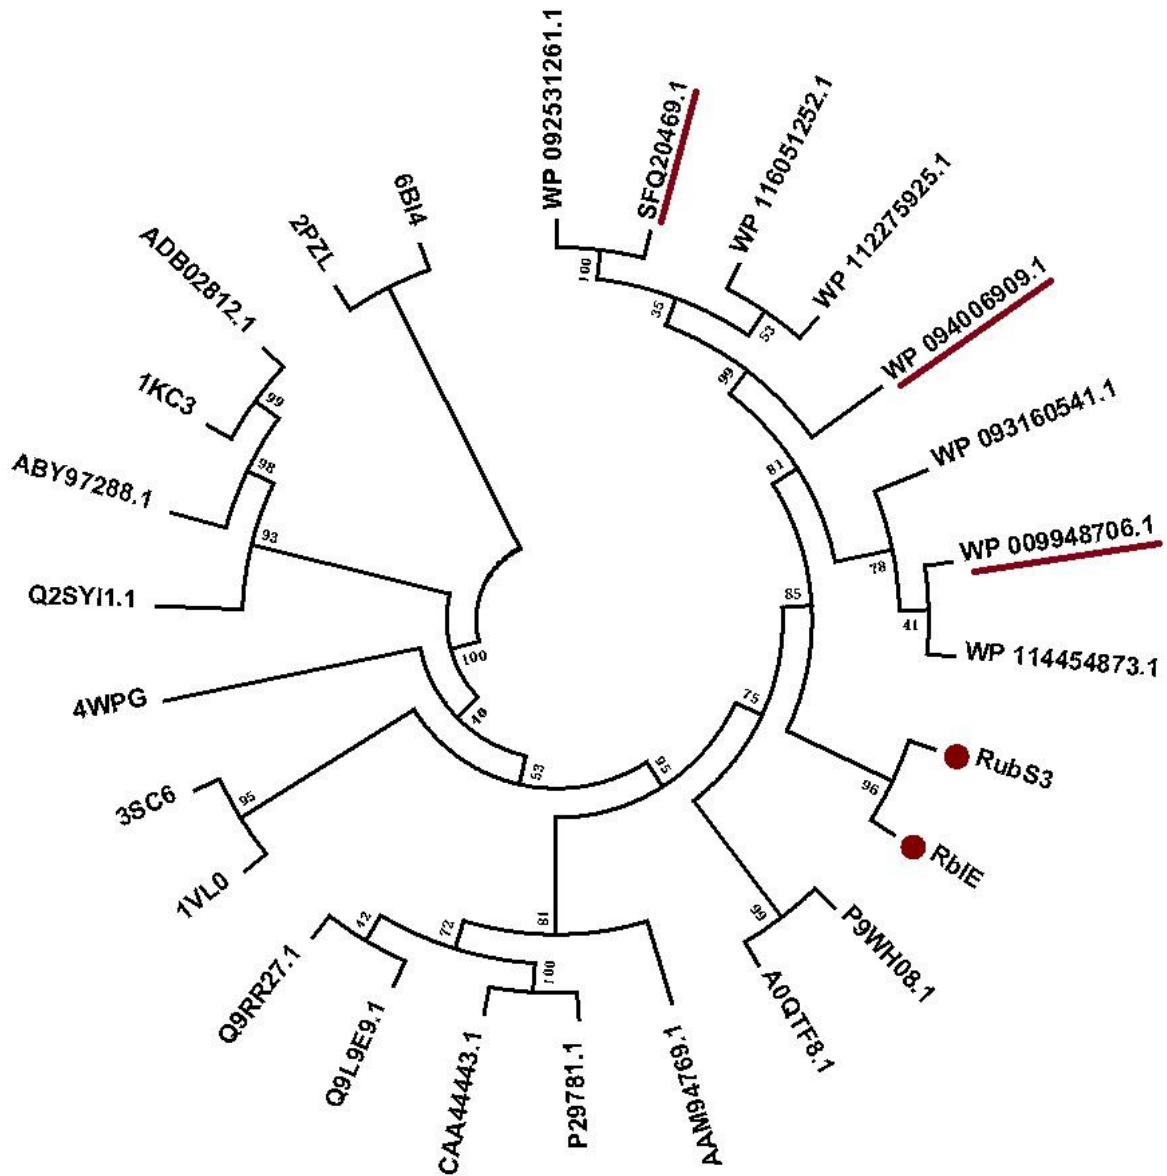

**Figure S8.** Phylogenetic analysis of RubS3 and its selected homologues. Sequences including two NDP-glucose-4,6-dehydratases (6BI4, RfbB from *B. anthracis*; 2PZL, WbmG from *B. bronchiseptica*) and four TDP-4-dehydrorhamnose reductases (3SC6, RfbD from *B. anthracis*; 4WPG, RmID from *Streptococcus pyogenes*; 1KC3, RmID from *Salmonella enterica*; 1VL0, RfbD from *Clostridium acetobutylicum*) are from Protein Data Dank (PDB). Others are selected homologues indicated by GenBank accession code.



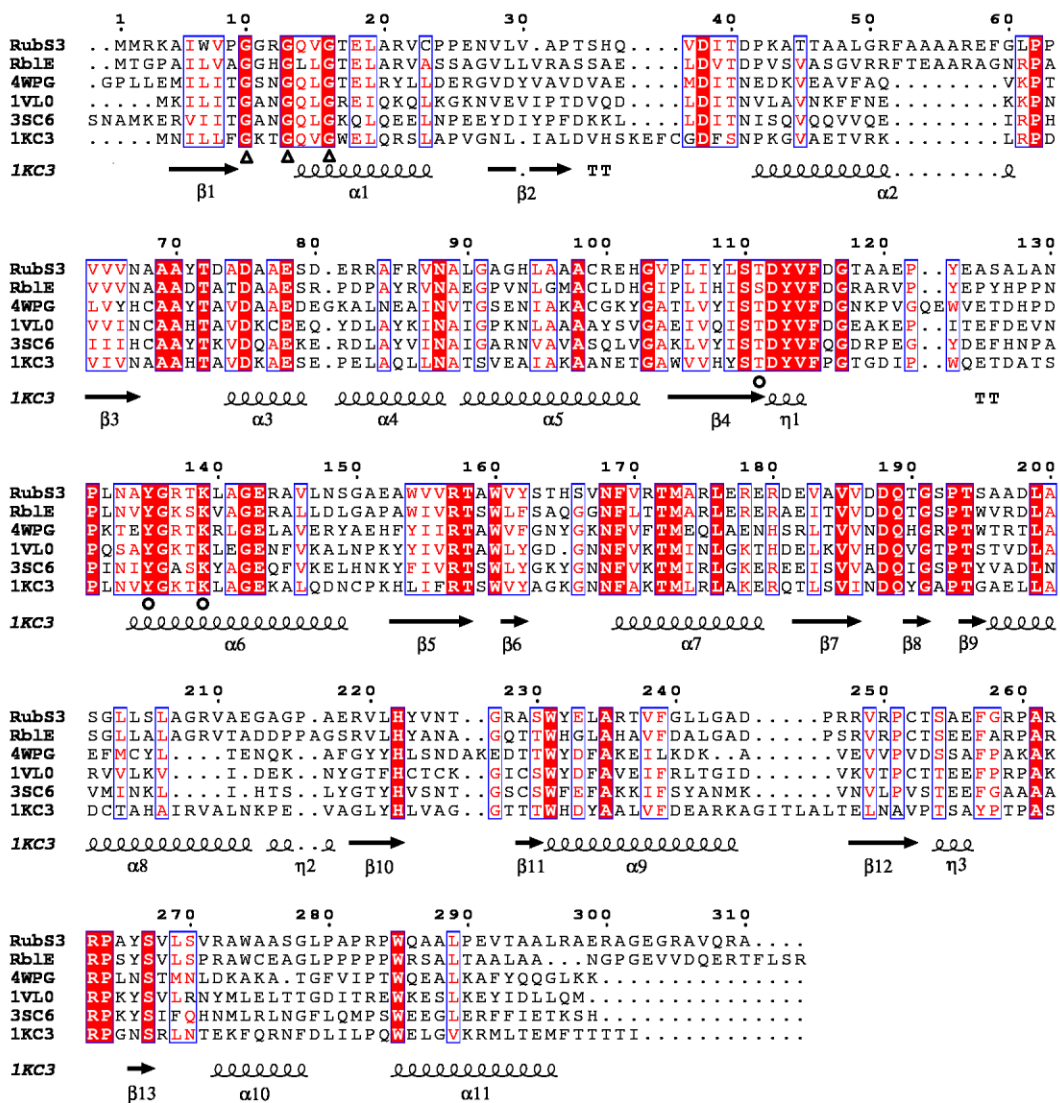

**Figure S9.** Alignment of the amino acid sequences for RubS3, RblE and four TDP-4-dehydrorhamnose reductases (1KC3, RmlD from *Salmonella enterica*; 4WPG, RmlD from *Streptococcus pyogenes*; 1VL0, RfbD from *Clostridium acetobutylicum*; 3SC6, RfbD from *B. anthracis*). The conserved GXXGXXG motif and catalytic TYK triad residues are indicated by triangle and circular, respectively.

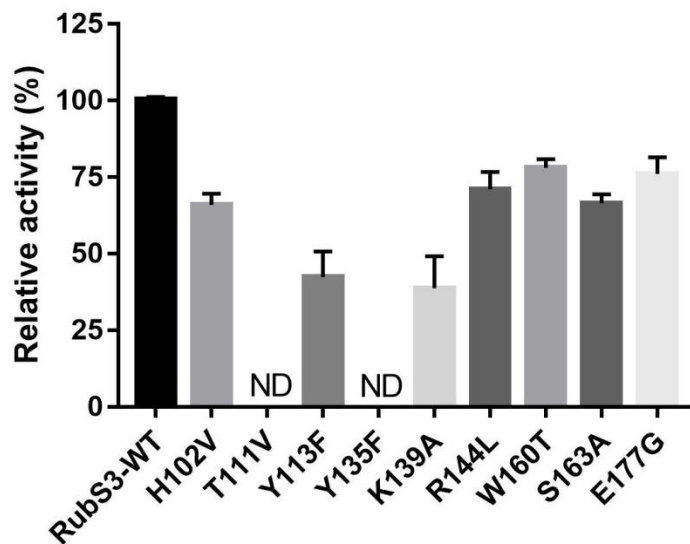

**Figure S10.** In vitro enzyme assays of mutants in parallel with RubS3-WT (wild type). All assays were conducted in duplicate and the relative activities were calculated from peak area ratios of product **4** between RubS3-WT and mutants. ND, the activity was not detected.

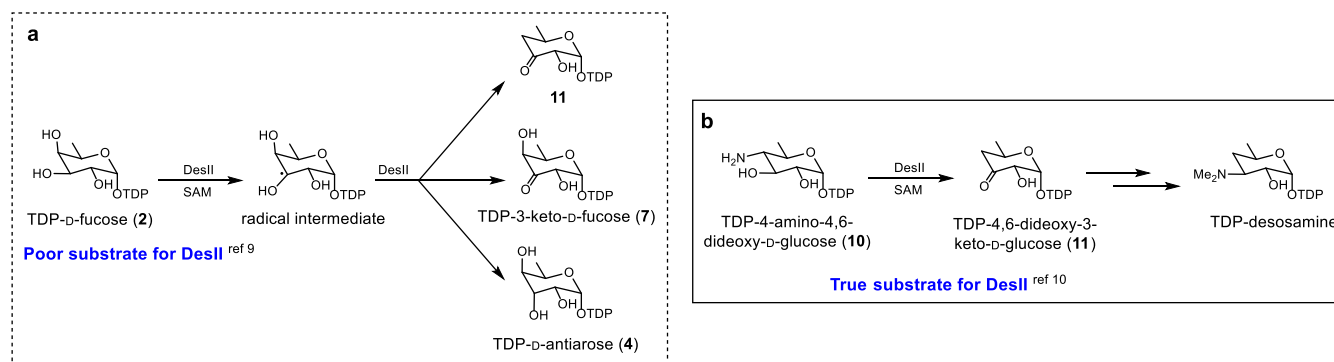

**Figure S11.** Radical *S*-adenosylmethionine dependent enzyme DesII-catalyzed reactions. **a** DesII can synthesize TDP-D-antiarose (**4**), TDP-3-keto-D-fucose (**7**), and TDP-4,6-dideoxy-3-keto-D-glucose (**11**) using the poor substrate TDP-D-fucose (**2**), which is not related to natural products biosynthesis. **b** DesII reaction using the true substrate **10** to generate the intermediate **11** in natural product biosynthesis.

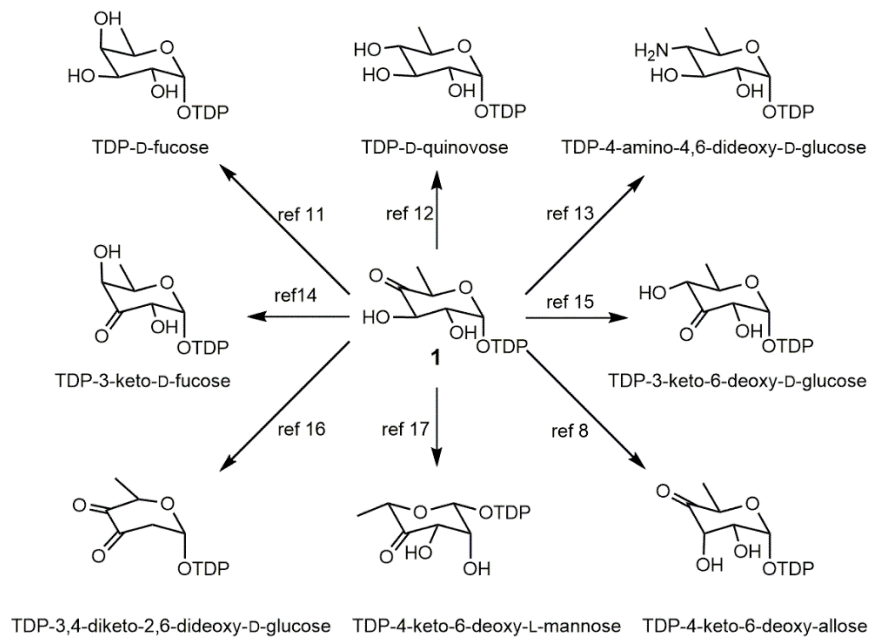

**Figure S12.** TDP-deoxysugars directly formed from TDP-4-keto-6-deoxy-D-glucose (**1**) by different reactions.

## User Spectra

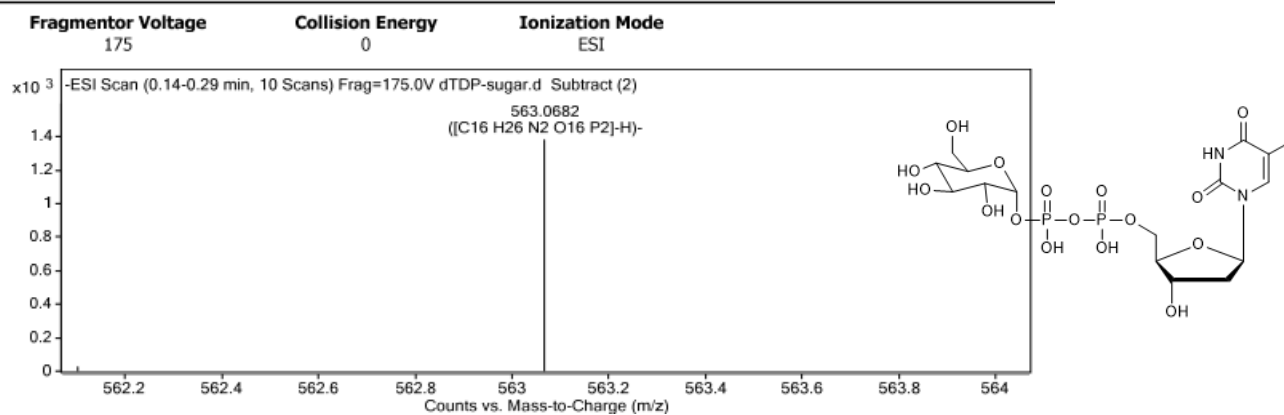

Figure S13. HRESIMS analysis of compound 3.

## User Spectra

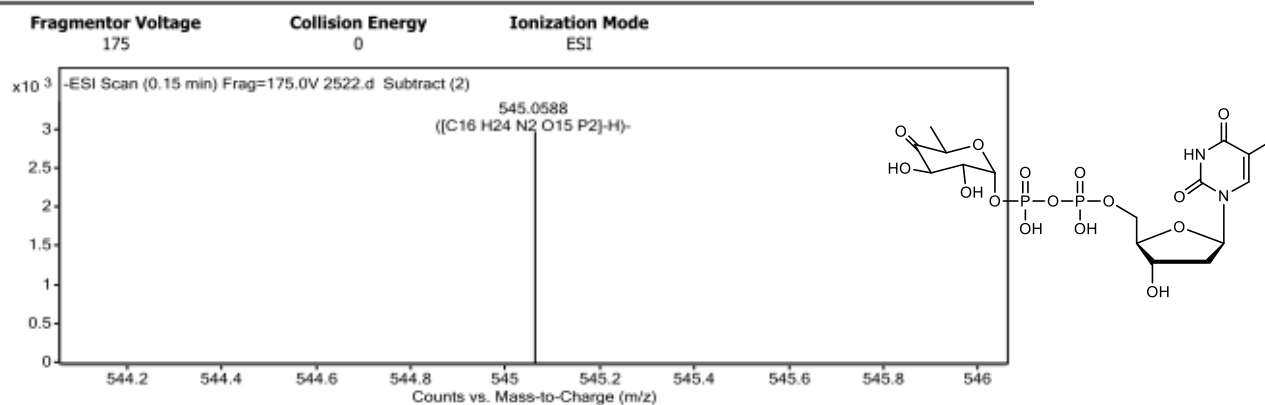

Figure S14. HRESIMS analysis of compound 1.

## User Spectra

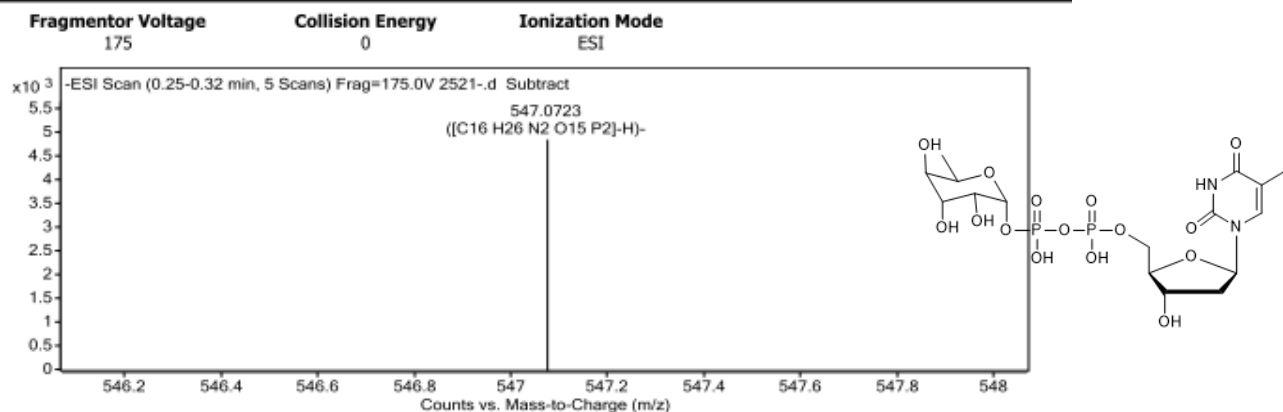

Figure S15. HRESIMS analysis of compound 4.

## User Spectra

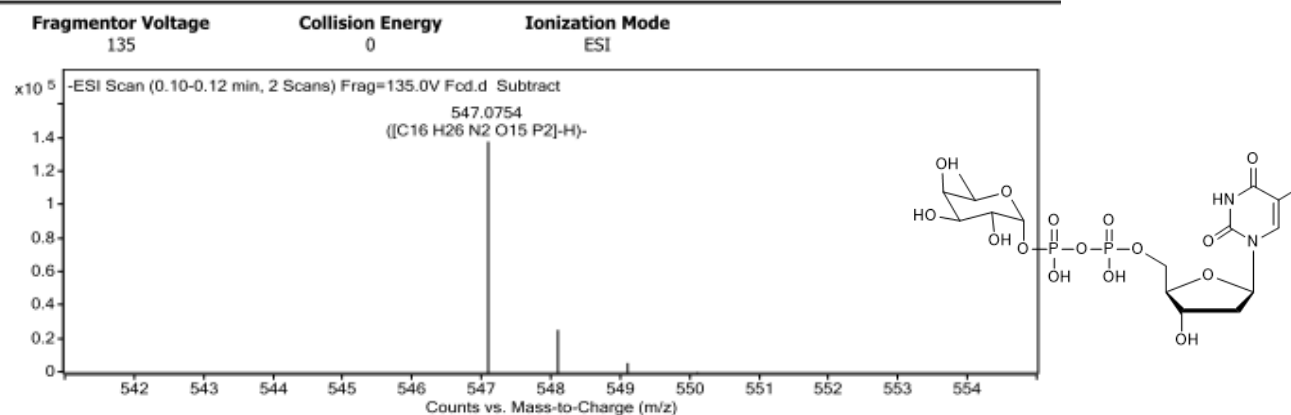

Figure S16. HRESIMS analysis of compound 2.

## User Spectra

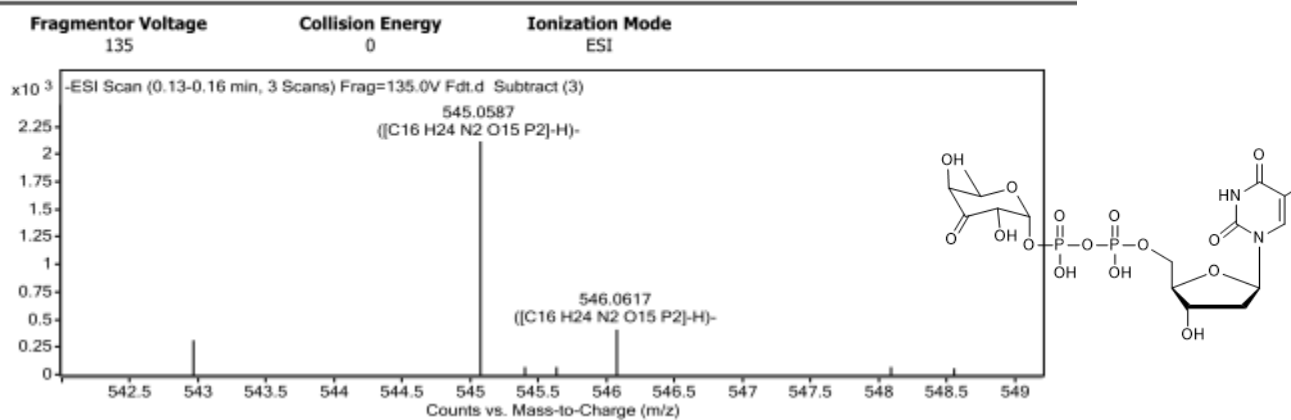

Figure S17. HRESIMS analysis of compound 7

## User Spectra

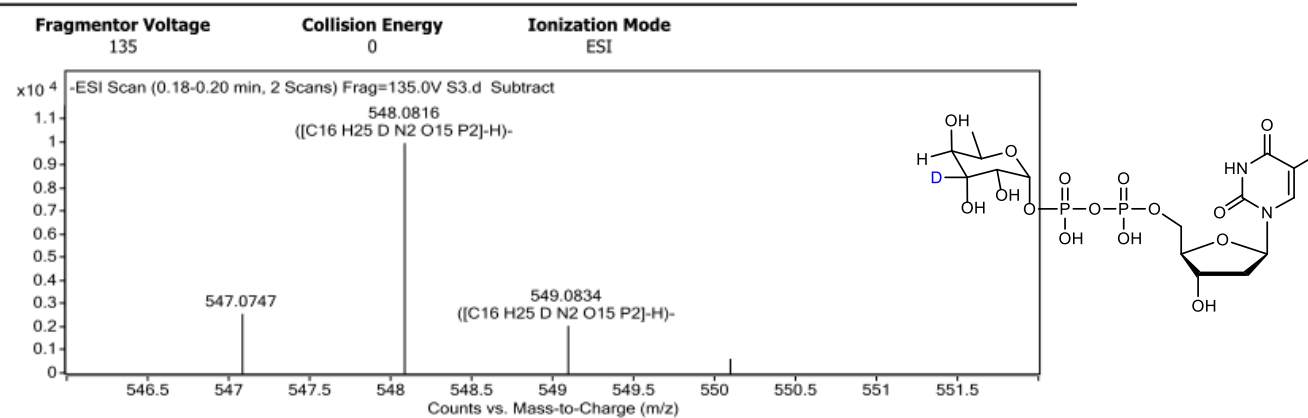

Figure S18. HRESIMS analysis of compound 4' formed with RubS3 in D<sub>2</sub>O

### User Spectra

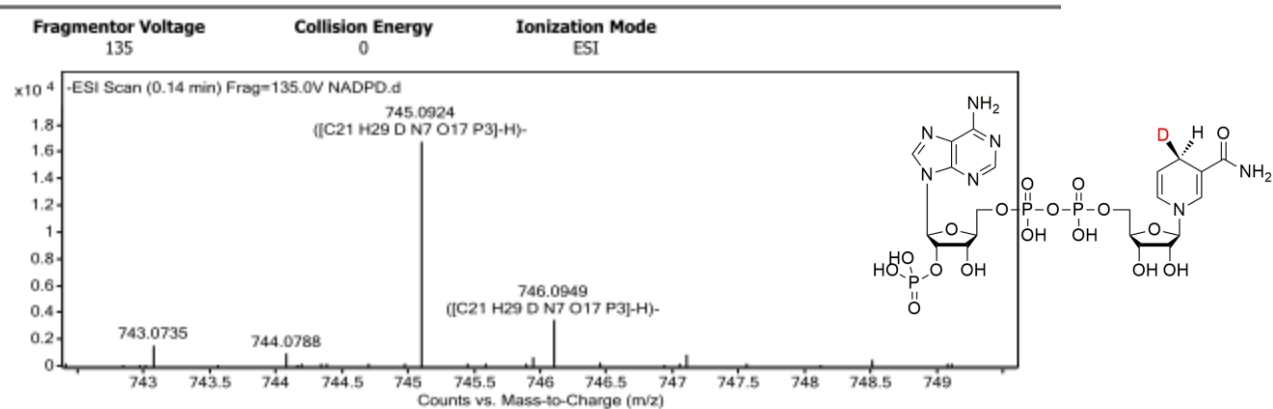

### User Spectra

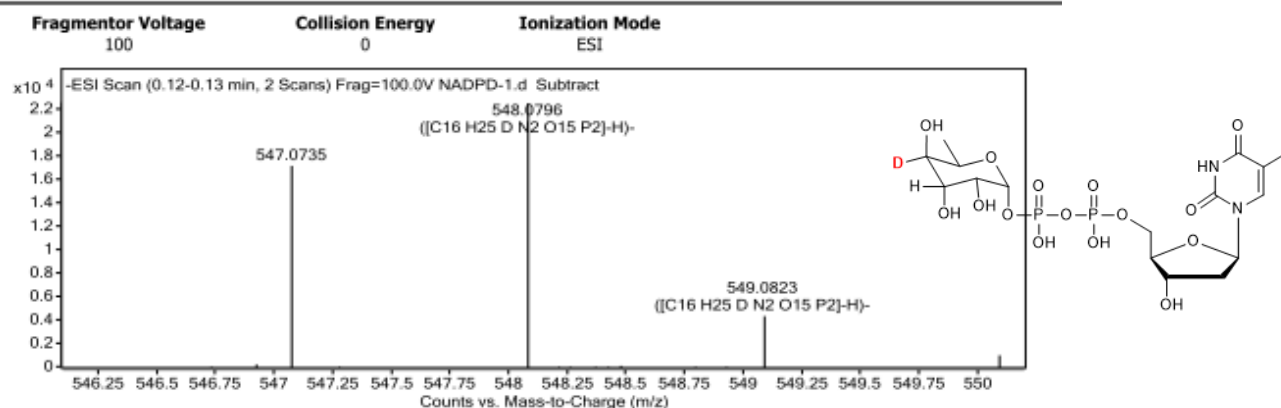

### User Spectra

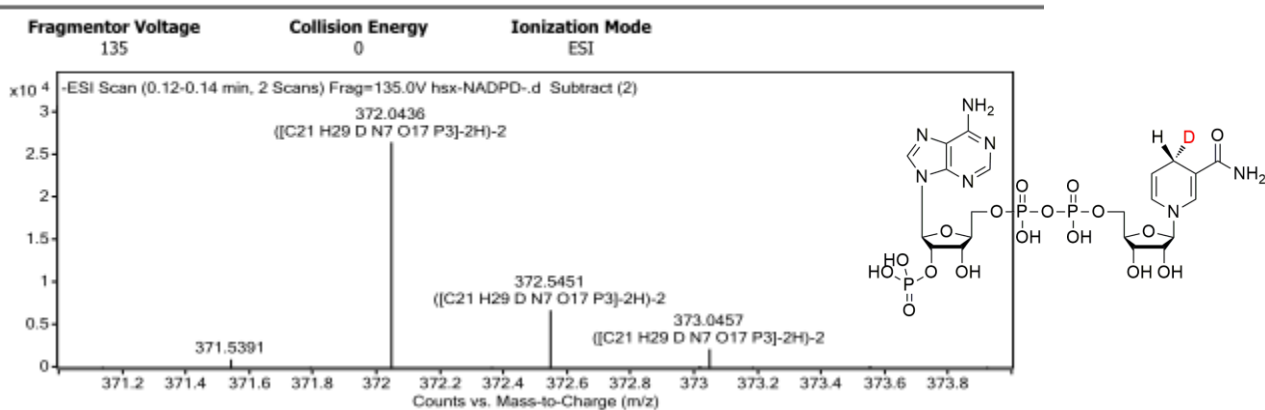

## User Spectra

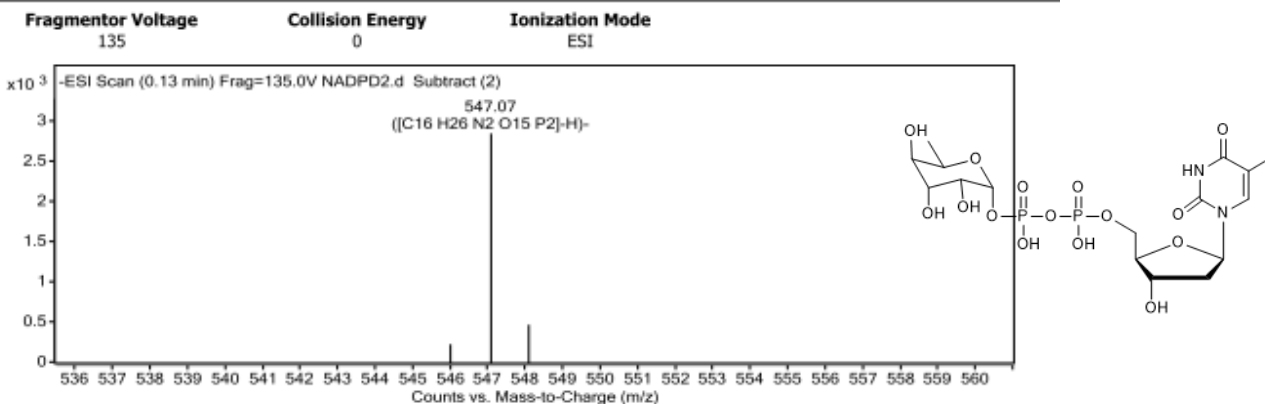

**Figure S22.** HRESIMS analysis of compound **4** formed with RubS3 use [4*R*-<sup>2</sup>H] NADPH as cofactor.

## User Spectra

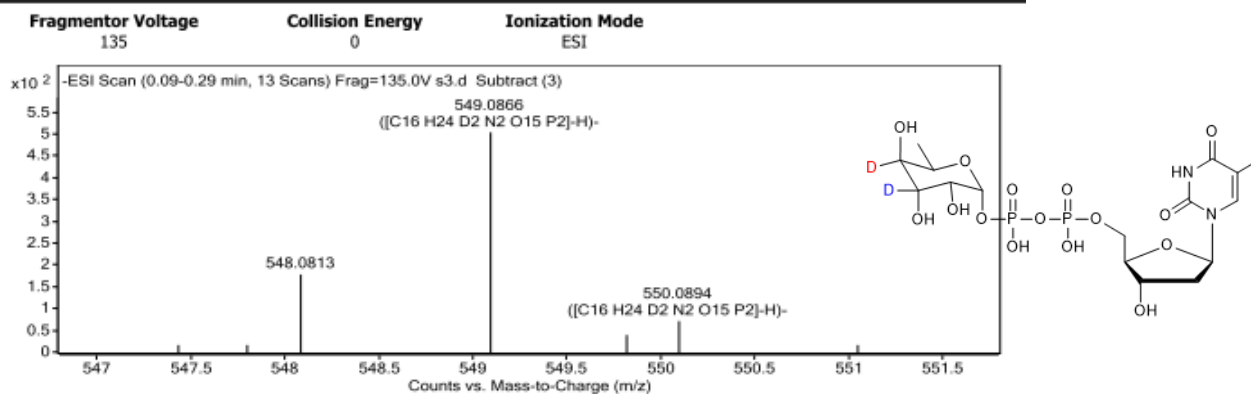

**Figure S23.** HRESIMS analysis of compound **4'''** formed with RubS3 in D<sub>2</sub>O and use [4*S*-<sup>2</sup>H]NADPH as cofactor.

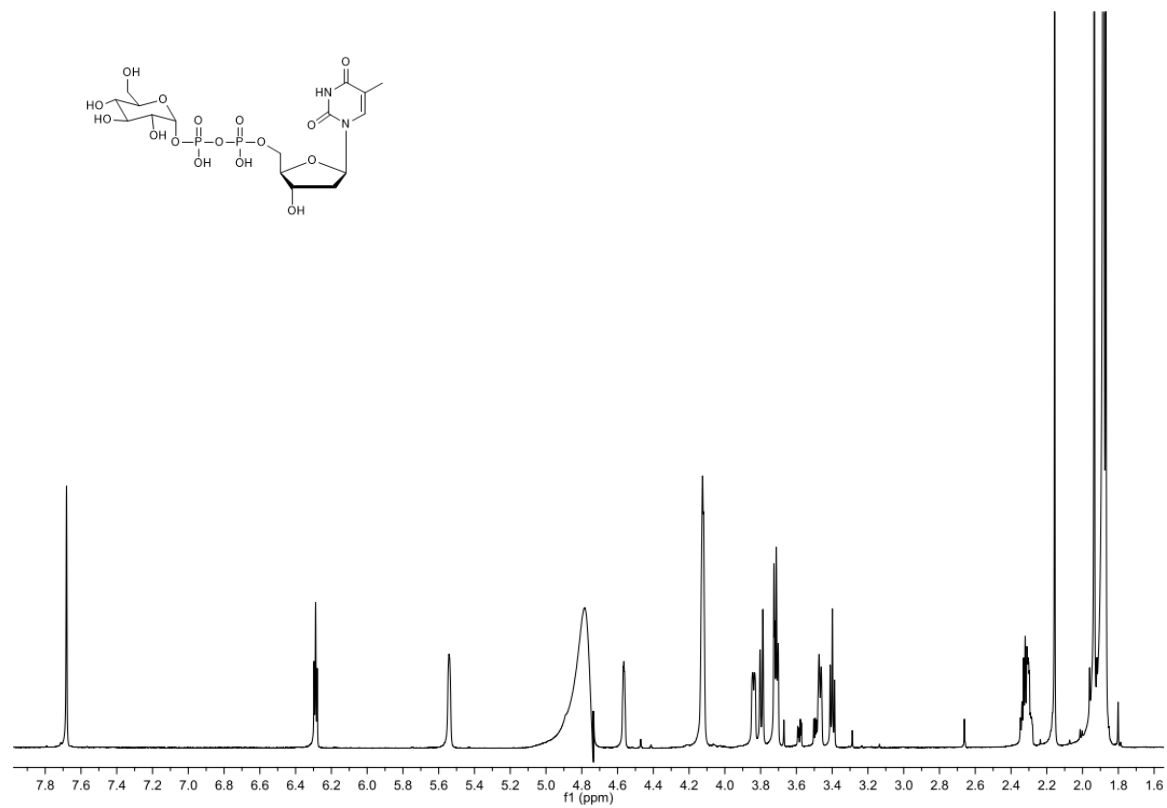

**Figure S24.** <sup>1</sup>H NMR spectrum of compound **3** in D<sub>2</sub>O.

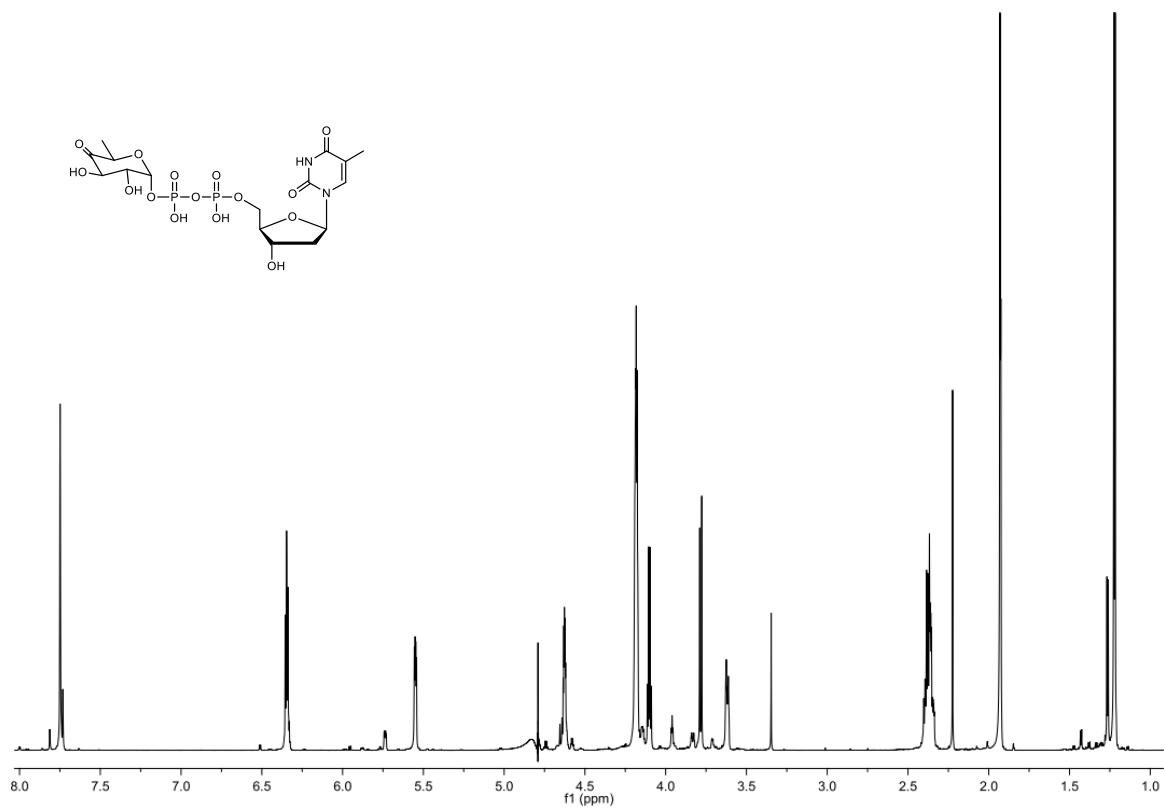

**Figure S25.** <sup>1</sup>H NMR spectrum of compound **1** in D<sub>2</sub>O.



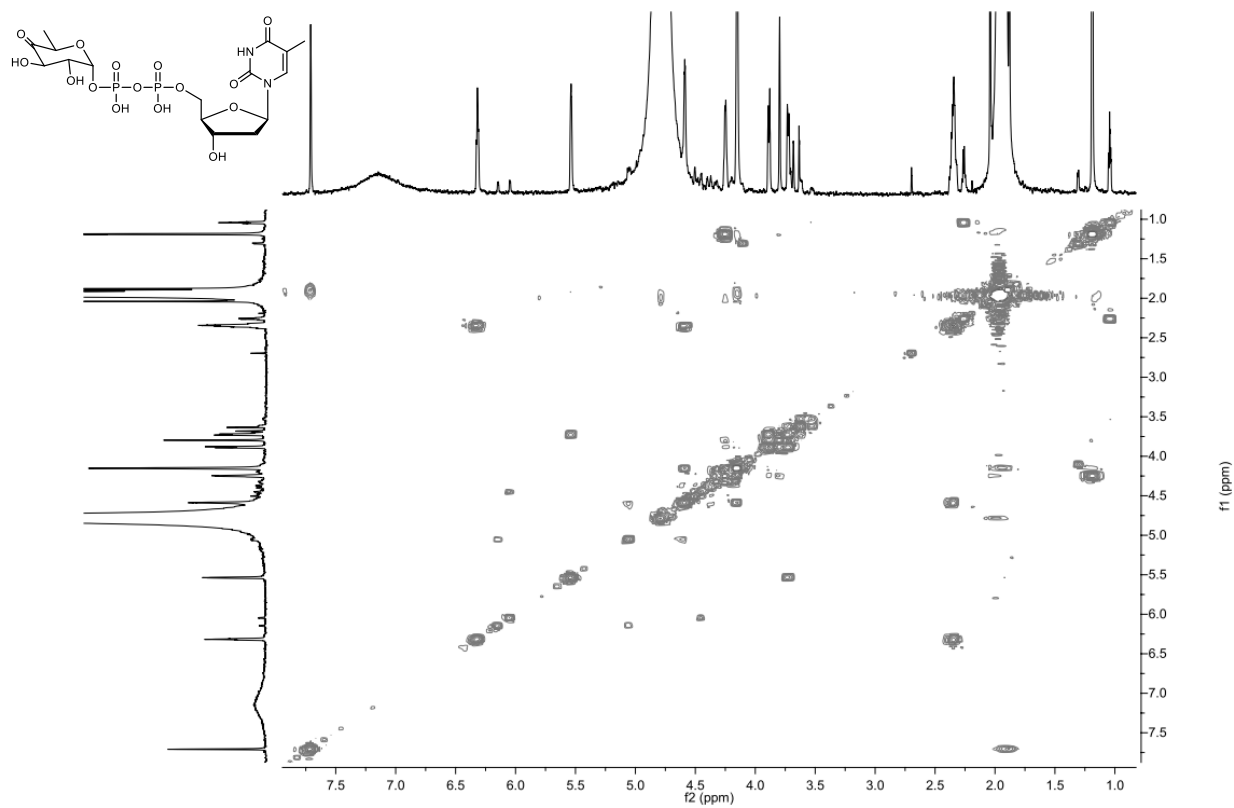

**Figure S26.**  $^1\text{H}$ - $^1\text{H}$  COSY NMR spectrum of compound **1** in  $\text{D}_2\text{O}$ .

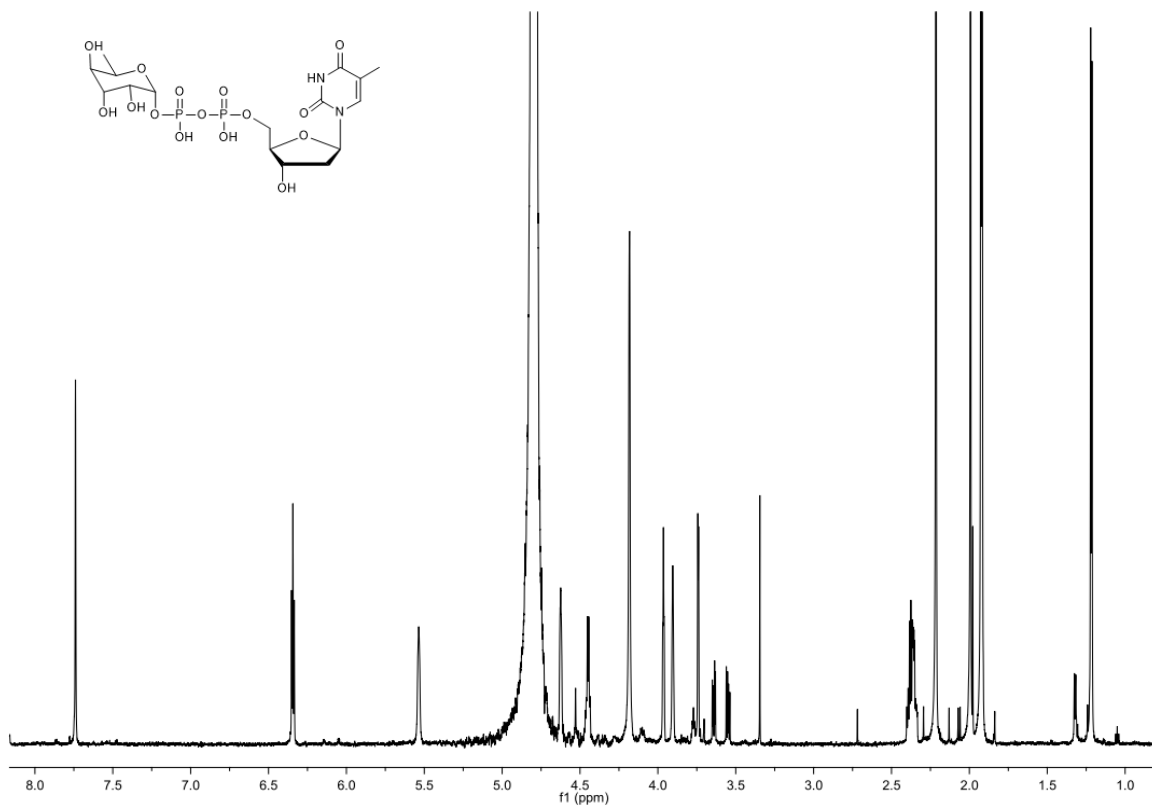

**Figure S27.**  $^1\text{H}$  NMR spectrum of compound **4** in  $\text{D}_2\text{O}$ .

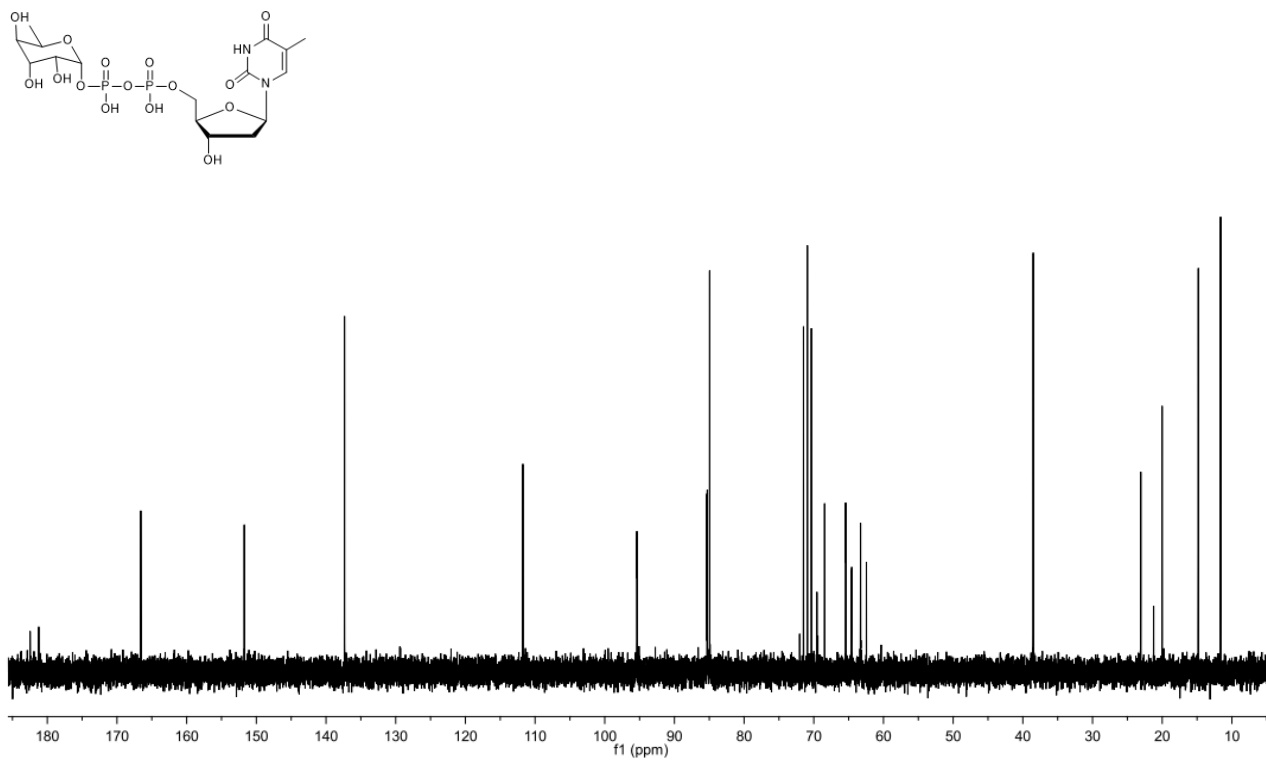

**Figure S28.**  $^{13}\text{C}$  NMR spectrum of compound 4 in  $\text{D}_2\text{O}$ .

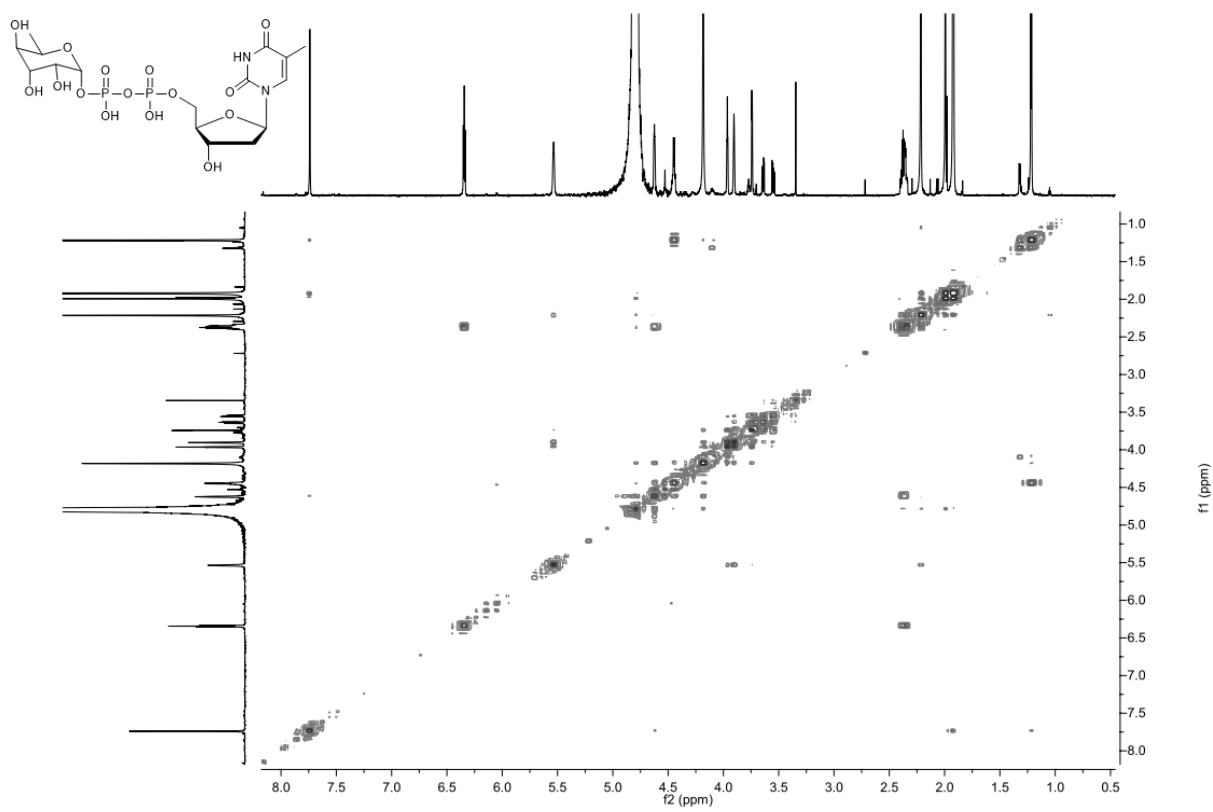

**Figure S29.**  $^1\text{H}$ - $^1\text{H}$  COSY NMR spectrum of compound 4 in  $\text{D}_2\text{O}$ .

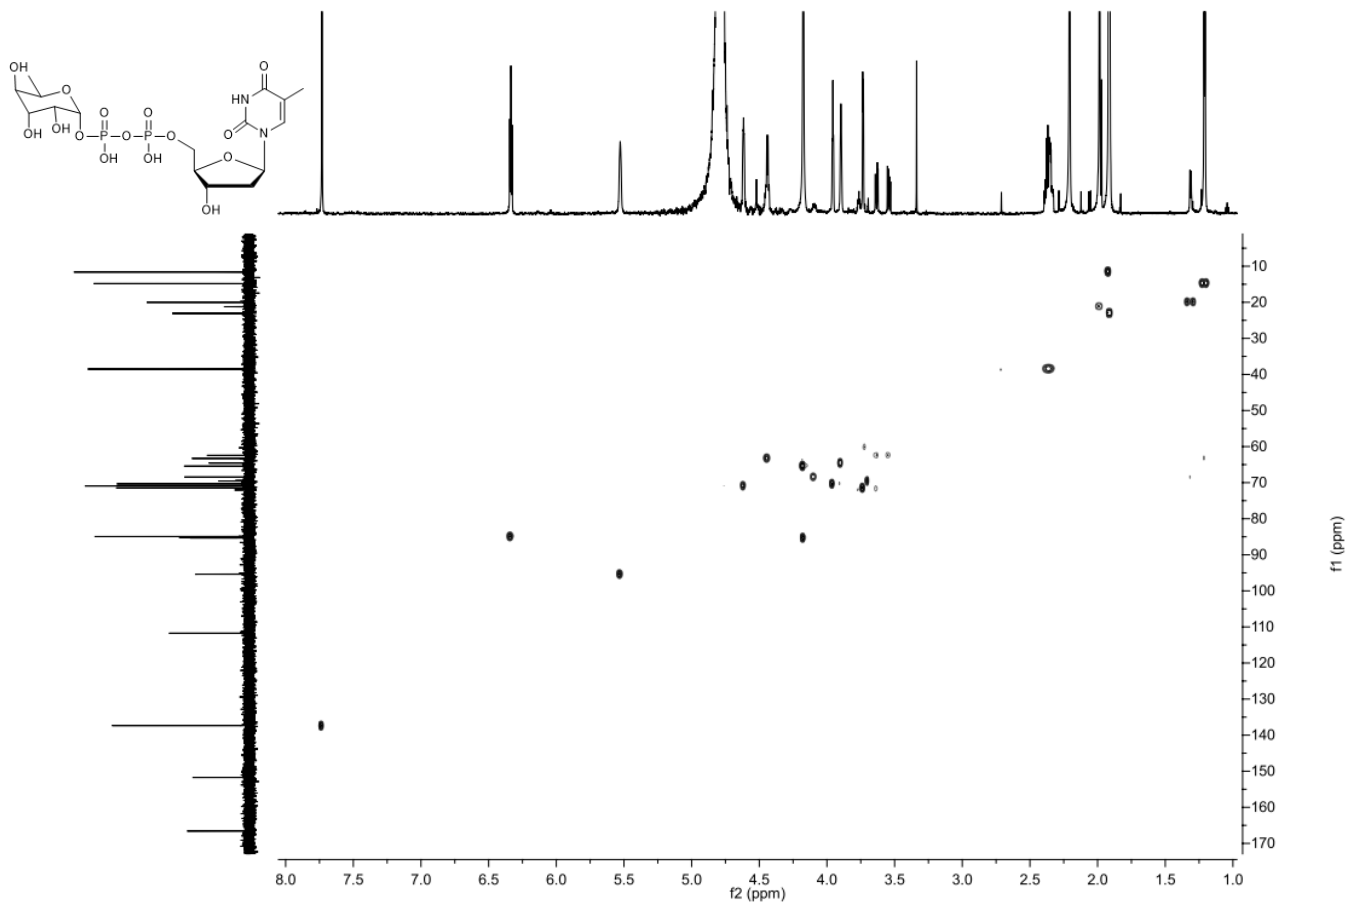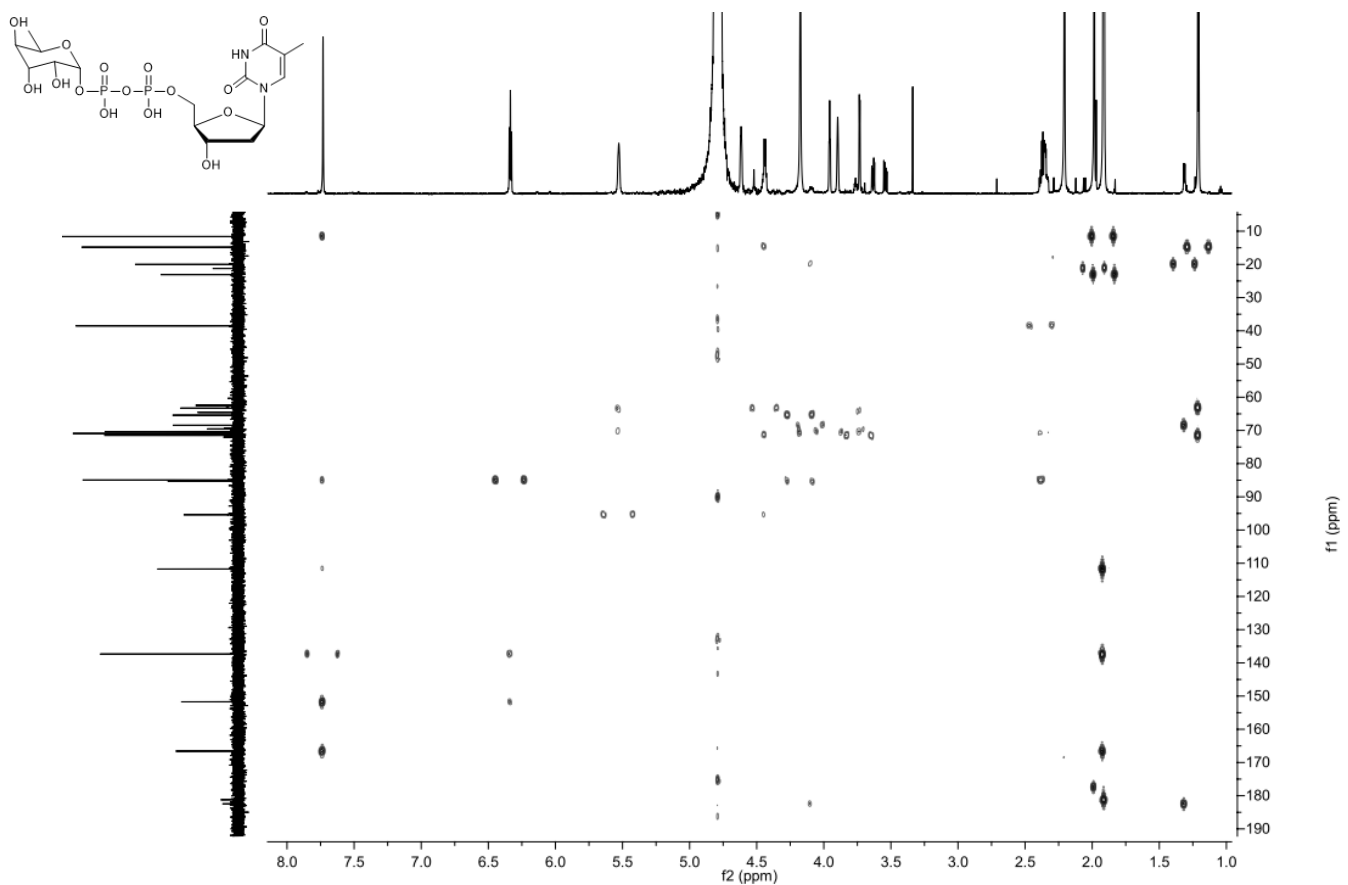

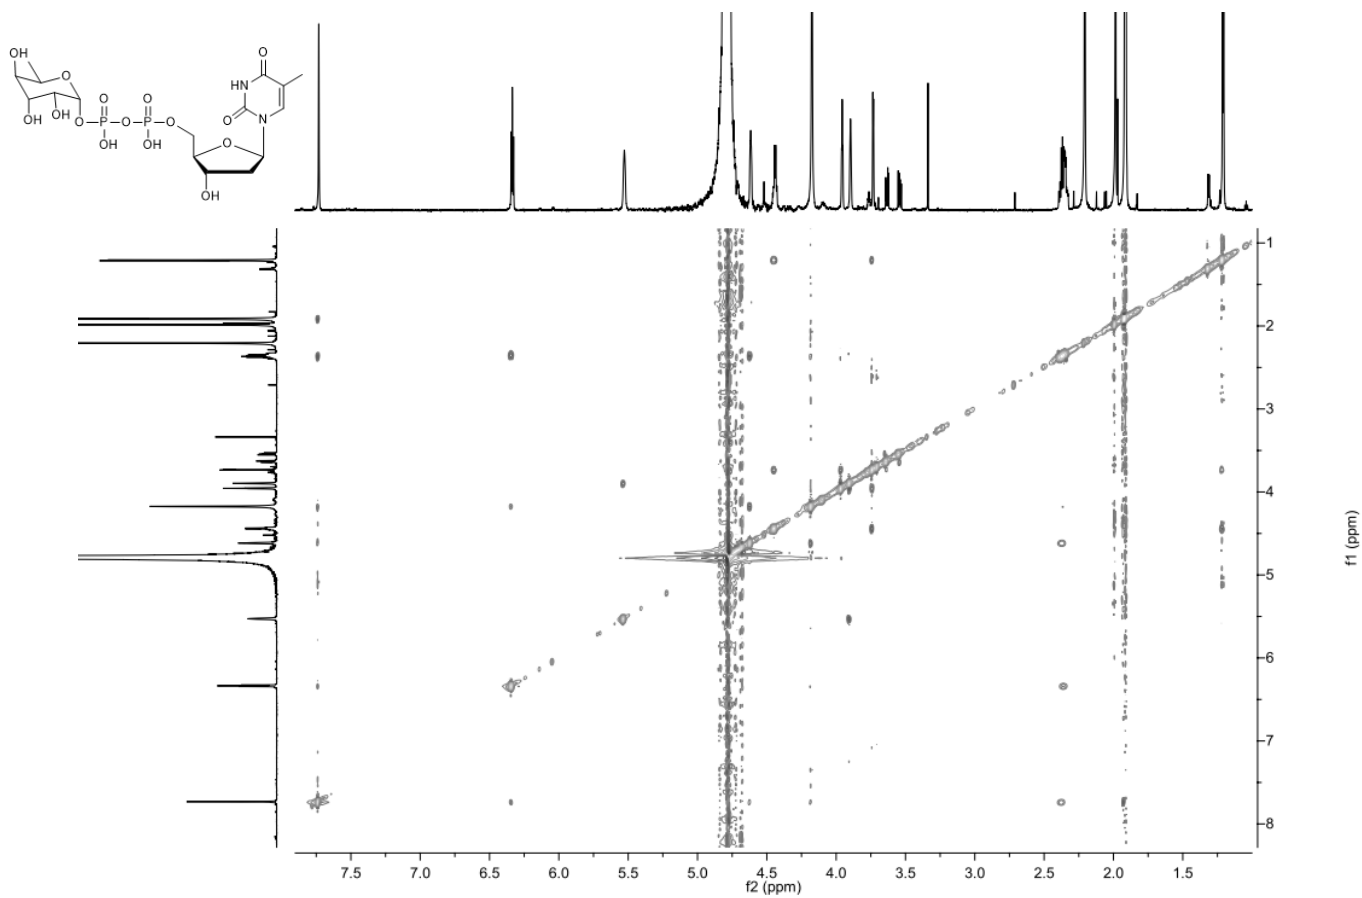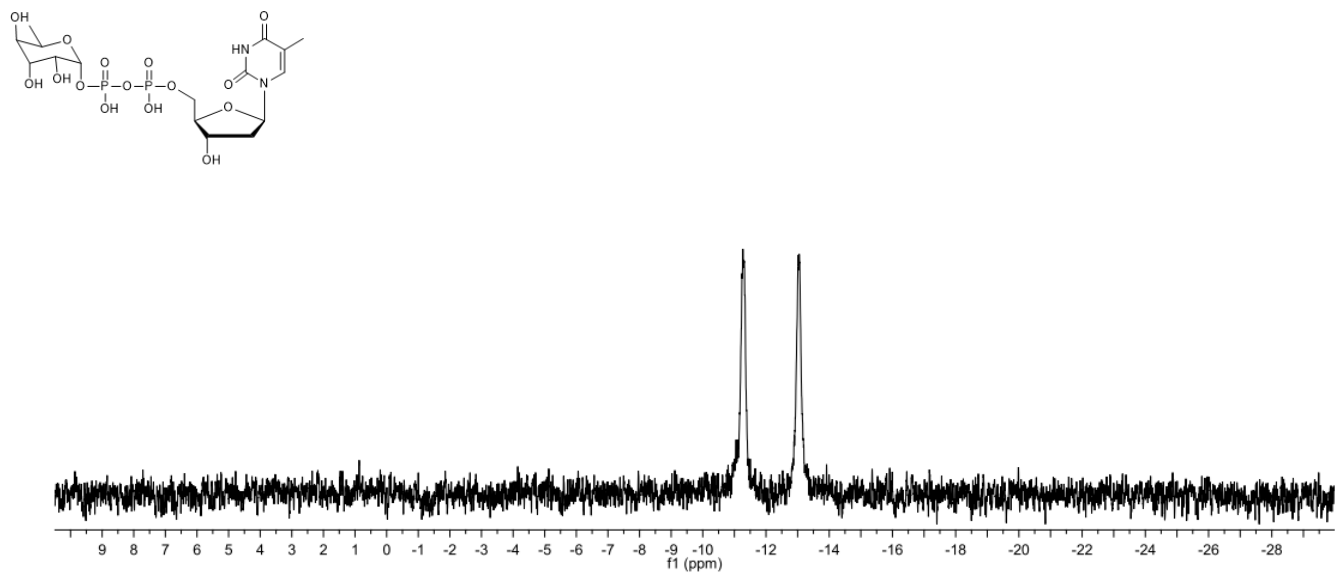

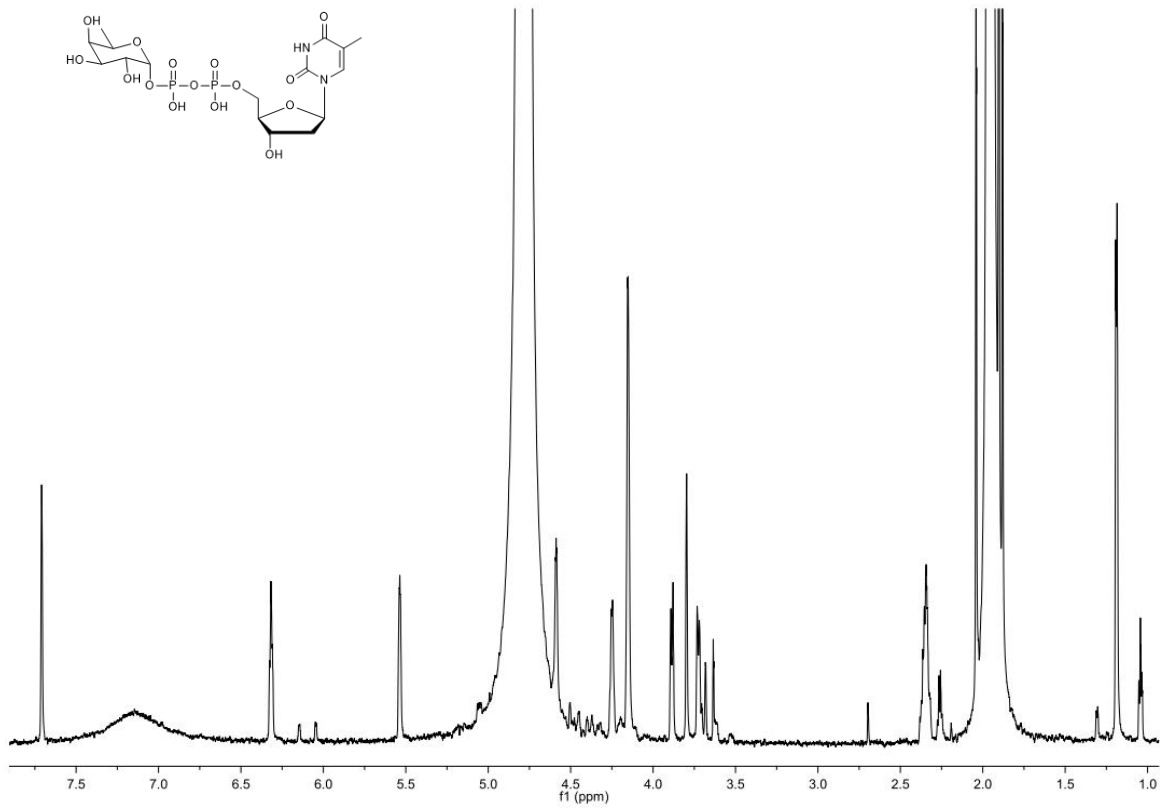

**Figure S34.**  $^1\text{H}$  NMR spectrum of compound **2** in  $\text{D}_2\text{O}$ .

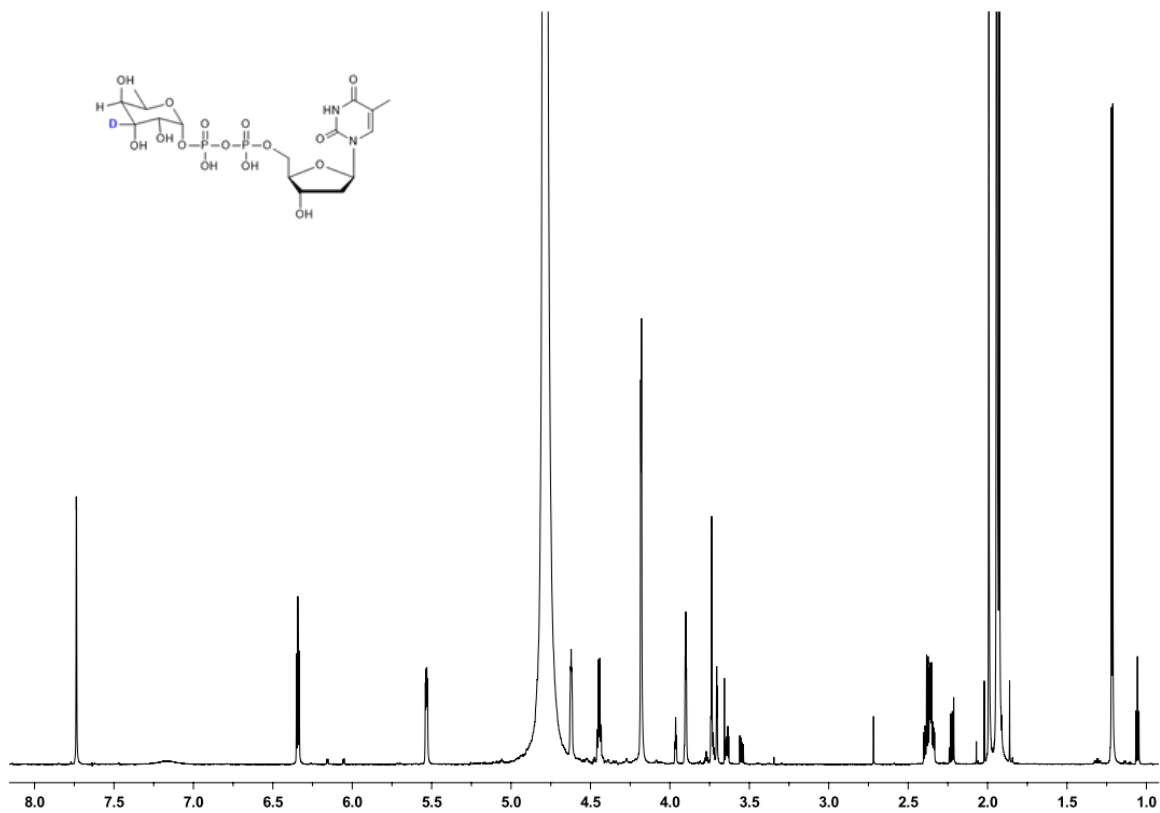

**Figure S35.**  $^1\text{H}$  NMR spectrum of compound **4'** in  $\text{D}_2\text{O}$ .

## References

1. Y. Yan, J. Yang, Z. Yu, M. Yu, Y.-T. Ma, L. Wang, C. Su, J.-Y., Luo, G. P. Horsman and S.-X. Huang, *Nat. Commun.*, 2016, **7**, 13083.
2. V. V. Pollock and M. J. Barber, *Biochemistry*, 2001, **40**, 1430-1440.
3. J. Felsenstein, *Evolution*, 1985, **39**, 783-791.
4. S. Kumar, K. Tamura and M. Nei, *Brief. Bioinform.*, 2004, **5**, 150-163.
5. F. Madeira, Y. M. Park, J. Lee, N. Buso, T. Gur, N. Madhusoodanan, P. Basutkar, A. R. N. Tivey, S. C. Potter, R. D. Finn and R. Lopez, *Nucl. Acids Res.*, 2019, **47**, 636-641.
6. X. Robert and P. Gouet, *Nucl. Acids Res.*, 2014, **42**, 320-324.
7. L. Elling, C. Rupprath, N. Günther, U. Römer, S. Verseck, P. Weingarten, G. Drager, A. Kirschning and W. Piepersberg, *ChemBioChem*, 2005, **6**, 1423-1430.
8. T. T. T. Thuy, K. Liou, T.-J. Oh, D.-H. Kim, D.-H. Nam, J.-C. Yoo and J.-K. Sohng, *Glycobiology*, 2007, **17**, 119-126.
9. Y. Ko, M. W. Ruszczycky, S.-H. Choi and H.-W. Liu, *Angew. Chem. Int. Ed.*, 2015, **54**, 860-863.
10. P.-H. Szu, M. W. Ruszczycky, S.-H. Choi, F. Yan and H.-W. Liu, *J. Am. Chem. Soc.*, 2009, **131**, 14030-14042.
11. Y. Yoshida, Y. Nakano, T. Nezu, Y. Yamashita and T. Koga, *J. Biol. Chem.*, 1999, **274**, 16933-16939.
12. S. A. Borisova, L. Zhao, D. H. Sherman and H.-W. Liu, *Org. Lett.*, 1999, **1**, 133-136.
13. Y.-S. Chung, D.-H. Kim, W.-M. Seo, H.-C. Lee, K. Liou, T.-J. Oh and J.-K. Sohng, *Carbohydr. Res.*, 2007, **34**, 1412-1418.
14. A. Pfoestl, A. Hofinger, P. Kosma and P. Messner, *J. Biol. Chem.*, 2003, **278**, 26410-26417.
15. C. E. Melancon, L. Hong, J. A. White, Y.-N. Liu and H.-W. Liu, *Biochemistry*, 2007, **46**, 577-590.
16. H.-W. Chen, G. Agnihotri, Z. Guo, N. L. S Que, X.-H. Chen and H.-W. Liu, *J. Am. Chem. Soc.*, 1999, **121**, 8124-8125.
17. M. Graninger, B. Nidetzky, D. E. Heinrichs, C. Whitfield and P. Messner, *J. Biol. Chem.*, 1999, **274**, 25069-25077.
